# Supplementary material for: Ultra Large Gene Families: A Matter of Adaptation or Genomic Parasites?
Source: Life (Basel). 2016 Aug 8;6(3):32. doi: 10.3390/life6030032 (PMC5041008; doi:10.3390/life6030032)
Supplement: Supplementary File 1 [file life-06-00032-s001.ods]

## Sheet: Domain counts 1-100
Counts	PfamID	Organism	Pfam functions	GO-terms
3	PF16905	remanei	None
7	PF16905	orang	None
3	PF16905	japonica	None
66	PF16905	human	None
11	PF16905	gorilla	None
6	PF16905	elegans	None
9	PF16905	chimp	None
2	PF16905	briggsae	None
29	PF16905	bonobo	None
2	PF16905	angaria	None
53	PF16905	Dsimulans	None
22	PF16905	Dpseudo	None
30	PF16905	Dmelano	None
7	PF16905	Derecta	None
3	PF16885	orang	None
45	PF16885	human	None
5	PF16885	gorilla	None
4	PF16885	chimp	None
22	PF16885	bonobo	None
2	PF16885	Dsimulans	None
8	PF16885	Dmelano	None
2	PF16866	orang	None	GO:protein binding ; GO:0005515
29	PF16866	human	None	GO:protein binding ; GO:0005515
3	PF16866	gorilla	None	GO:protein binding ; GO:0005515
20	PF16866	chimp	None	GO:protein binding ; GO:0005515
17	PF16866	bonobo	None	GO:protein binding ; GO:0005515
2	PF16866	Dpseudo	None	GO:protein binding ; GO:0005515
2	PF16705	japonica	None
2	PF16705	human	None
2	PF16705	gorilla	None
2	PF16705	elegans	None
2	PF16705	chimp	None
2	PF16705	brenneri	None
5	PF16704	orang	None
31	PF16704	human	None
2	PF16704	elegans	None
4	PF16704	chimp	None
11	PF16700	human	None
3	PF16700	gorilla	None
3	PF16700	bonobo	None
2	PF16666	orang	None
36	PF16666	human	None
2	PF16666	gorilla	None
31	PF16666	chimp	None
20	PF16666	bonobo	None
2	PF16663	orang	None
31	PF16663	human	None
2	PF16663	gorilla	None
31	PF16663	chimp	None
20	PF16663	bonobo	None
2	PF16662	orang	None
9	PF16662	human	None
3	PF16662	bonobo	None
9	PF16641	orang	None
5	PF16641	human	None
7	PF16641	chimp	None
15	PF16641	Dsimulans	None
11	PF16641	Dpseudo	None
8	PF16641	Dmelano	None
2	PF16641	Derecta	None
19	PF16602	human	None
4	PF16602	gorilla	None
17	PF16602	chimp	None
11	PF16602	bonobo	None
3	PF16519	orang	None
42	PF16519	human	None
6	PF16519	gorilla	None
40	PF16519	chimp	None
11	PF16519	bonobo	None
24	PF16519	Dsimulans	None
18	PF16519	Dpseudo	None
8	PF16519	Dmelano	None
13	PF16519	Derecta	None
2	PF16494	remanei	None
2	PF16494	orang	None
3	PF16494	japonica	None
22	PF16494	human	None
6	PF16494	gorilla	None
5	PF16494	elegans	None
17	PF16494	chimp	None
2	PF16494	briggsae	None
2	PF16494	brenneri	None
5	PF16494	bonobo	None
4	PF16494	angaria	None
5	PF16494	Dsimulans	None
9	PF16494	Dpseudo	None
7	PF16494	Dmelano	None
2	PF16494	Derecta	None
17	PF16474	human	None
3	PF16474	gorilla	None
4	PF16474	chimp	None
5	PF16474	bonobo	None
4	PF16474	Dsimulans	None
3	PF16474	Dpseudo	None
8	PF16474	Dmelano	None
3	PF16474	Derecta	None
2	PF16453	remanei	None
2	PF16453	orang	None
31	PF16453	human	None
4	PF16453	gorilla	None
4	PF16453	elegans	None
3	PF16453	chimp	None
3	PF16453	brenneri	None
11	PF16453	bonobo	None
4	PF16453	Dsimulans	None
5	PF16453	Dpseudo	None
4	PF16453	Dmelano	None
4	PF16453	Derecta	None
10	PF16182	orang	None
73	PF16182	human	None
4	PF16182	gorilla	None
44	PF16182	chimp	None
38	PF16182	bonobo	None
2	PF16134	orang	None
2	PF16134	japonica	None
8	PF16134	human	None
2	PF16134	Dsimulans	None
3	PF16134	Dmelano	None
5	PF16134	Derecta	None
3	PF15974	orang	None
42	PF15974	human	None
4	PF15974	gorilla	None
31	PF15974	chimp	None
2	PF15974	bonobo	None
5	PF15964	orang	None
19	PF15964	human	None
6	PF15964	bonobo	None
5	PF15964	Dsimulans	None
6	PF15964	Dpseudo	None
7	PF15964	Dmelano	None
2	PF15964	Derecta	None
6	PF15949	orang	None
50	PF15949	human	None
6	PF15949	gorilla	None
43	PF15949	chimp	None
20	PF15949	bonobo	None
5	PF15949	Dsimulans	None
4	PF15949	Dpseudo	None
6	PF15949	Dmelano	None
5	PF15949	Derecta	None
20	PF15918	Dpseudo	None
15	PF15877	human	None
5	PF15870	orang	None
8	PF15870	human	None
14	PF15870	gorilla	None
5	PF15870	elegans	None
5	PF15870	chimp	None
4	PF15870	bonobo	None
9	PF15840	human	None
3	PF15804	human	None
11	PF15779	orang	None
59	PF15779	human	None
2	PF15779	gorilla	None
12	PF15779	chimp	None
8	PF15779	bonobo	None
7	PF15722	human	None
2	PF15722	gorilla	None
5	PF15722	chimp	None
22	PF15717	human	None
2	PF15717	gorilla	None
16	PF15717	chimp	None
11	PF15717	bonobo	None
2	PF15511	remanei	Centromere kinetochore component CENP-T
8	PF15511	orang	Centromere kinetochore component CENP-T
2	PF15511	japonica	Centromere kinetochore component CENP-T
4	PF15511	human	Centromere kinetochore component CENP-T
4	PF15511	gorilla	Centromere kinetochore component CENP-T
6	PF15511	chimp	Centromere kinetochore component CENP-T
2	PF15511	briggsae	Centromere kinetochore component CENP-T
6	PF15511	brenneri	Centromere kinetochore component CENP-T
9	PF15511	bonobo	Centromere kinetochore component CENP-T
2	PF15511	angaria	Centromere kinetochore component CENP-T
2	PF15511	Dsimulans	Centromere kinetochore component CENP-T
2	PF15511	Dmelano	Centromere kinetochore component CENP-T
3	PF15511	Derecta	Centromere kinetochore component CENP-T
8	PF15380	human	Domain of unknown function (DUF4607)
4	PF15380	chimp	Domain of unknown function (DUF4607)
24	PF15368	human	Spermatogenesis family BioT2
7	PF15368	chimp	Spermatogenesis family BioT2
4	PF15368	bonobo	Spermatogenesis family BioT2
2	PF15361	remanei	Resistance to inhibitors of cholinesterase homologue 3
5	PF15361	orang	Resistance to inhibitors of cholinesterase homologue 3
6	PF15361	human	Resistance to inhibitors of cholinesterase homologue 3
3	PF15361	gorilla	Resistance to inhibitors of cholinesterase homologue 3
6	PF15361	chimp	Resistance to inhibitors of cholinesterase homologue 3
2	PF15361	brenneri	Resistance to inhibitors of cholinesterase homologue 3
3	PF15361	bonobo	Resistance to inhibitors of cholinesterase homologue 3
19	PF15361	Dsimulans	Resistance to inhibitors of cholinesterase homologue 3
15	PF15361	Dmelano	Resistance to inhibitors of cholinesterase homologue 3
10	PF15361	Derecta	Resistance to inhibitors of cholinesterase homologue 3
4	PF15336	orang	Autism susceptibility gene 2 protein
41	PF15336	human	Autism susceptibility gene 2 protein
3	PF15336	gorilla	Autism susceptibility gene 2 protein
22	PF15336	chimp	Autism susceptibility gene 2 protein
4	PF15336	bonobo	Autism susceptibility gene 2 protein
2	PF15336	Dmelano	Autism susceptibility gene 2 protein
14	PF15309	orang	ALMS motif
19	PF15309	human	ALMS motif
2	PF15309	gorilla	ALMS motif
17	PF15309	chimp	ALMS motif
15	PF15309	bonobo	ALMS motif
2	PF15309	Dsimulans	ALMS motif
4	PF15309	Dmelano	ALMS motif
12	PF15308	orang	CEP170 C-terminus
16	PF15308	human	CEP170 C-terminus
2	PF15308	gorilla	CEP170 C-terminus
12	PF15308	chimp	CEP170 C-terminus
10	PF15308	bonobo	CEP170 C-terminus
3	PF15274	orang	Muscular LMNA-interacting protein
10	PF15274	human	Muscular LMNA-interacting protein
20	PF15274	chimp	Muscular LMNA-interacting protein
9	PF15274	bonobo	Muscular LMNA-interacting protein
2	PF15256	orang	SPATIAL
26	PF15256	human	SPATIAL
3	PF15256	gorilla	SPATIAL
2	PF15256	chimp	SPATIAL
4	PF15256	bonobo	SPATIAL
4	PF15255	orang	WASH complex subunit CAP-Z interacting
23	PF15255	human	WASH complex subunit CAP-Z interacting
2	PF15255	gorilla	WASH complex subunit CAP-Z interacting
7	PF15255	chimp	WASH complex subunit CAP-Z interacting
2	PF15246	orang	Nck-associated protein 5
10	PF15246	human	Nck-associated protein 5
2	PF15246	gorilla	Nck-associated protein 5
2	PF15246	chimp	Nck-associated protein 5
3	PF15246	bonobo	Nck-associated protein 5
10	PF15240	orang	Proline-rich
12	PF15240	human	Proline-rich
6	PF15240	gorilla	Proline-rich
7	PF15240	chimp	Proline-rich
6	PF15240	bonobo	Proline-rich
7	PF15236	orang	Coiled-coil domain-containing protein 66
27	PF15236	human	Coiled-coil domain-containing protein 66
9	PF15236	chimp	Coiled-coil domain-containing protein 66
13	PF15236	bonobo	Coiled-coil domain-containing protein 66
4	PF15231	orang	Variable charge X/Y family
8	PF15231	human	Variable charge X/Y family
6	PF15231	chimp	Variable charge X/Y family
8	PF15096	human	G6B family	GO:integral component of membrane ; GO:0016021
5	PF15096	gorilla	G6B family	GO:integral component of membrane ; GO:0016021
5	PF15096	chimp	G6B family	GO:integral component of membrane ; GO:0016021
5	PF15096	bonobo	G6B family	GO:integral component of membrane ; GO:0016021
40	PF15070	orang	Putative golgin subfamily A member 2-like protein 5	GO:Golgi apparatus ; GO:0005794
3	PF15070	japonica	Putative golgin subfamily A member 2-like protein 5	GO:Golgi apparatus ; GO:0005794
72	PF15070	human	Putative golgin subfamily A member 2-like protein 5	GO:Golgi apparatus ; GO:0005794
16	PF15070	gorilla	Putative golgin subfamily A member 2-like protein 5	GO:Golgi apparatus ; GO:0005794
39	PF15070	chimp	Putative golgin subfamily A member 2-like protein 5	GO:Golgi apparatus ; GO:0005794
2	PF15070	brenneri	Putative golgin subfamily A member 2-like protein 5	GO:Golgi apparatus ; GO:0005794
15	PF15070	bonobo	Putative golgin subfamily A member 2-like protein 5	GO:Golgi apparatus ; GO:0005794
2	PF15070	angaria	Putative golgin subfamily A member 2-like protein 5	GO:Golgi apparatus ; GO:0005794
2	PF14961	orang	Broad-minded protein
17	PF14961	human	Broad-minded protein
2	PF14961	gorilla	Broad-minded protein
23	PF14951	human	Domain of unknown function (DUF4503)
2	PF14951	gorilla	Domain of unknown function (DUF4503)
6	PF14951	chimp	Domain of unknown function (DUF4503)
7	PF14951	bonobo	Domain of unknown function (DUF4503)
2	PF14950	orang	Domain of unknown function (DUF4502)
17	PF14950	human	Domain of unknown function (DUF4502)
6	PF14950	chimp	Domain of unknown function (DUF4502)
7	PF14950	bonobo	Domain of unknown function (DUF4502)
7	PF14946	human	Domain of unknown function (DUF4501)
6	PF14946	bonobo	Domain of unknown function (DUF4501)
2	PF14922	orang	Protein of unknown function
26	PF14922	human	Protein of unknown function
5	PF14922	chimp	Protein of unknown function
2	PF14922	bonobo	Protein of unknown function
23	PF14915	orang	CCDC144C protein coiled-coil region
87	PF14915	human	CCDC144C protein coiled-coil region
15	PF14915	gorilla	CCDC144C protein coiled-coil region
70	PF14915	chimp	CCDC144C protein coiled-coil region
7	PF14915	bonobo	CCDC144C protein coiled-coil region
11	PF14914	orang	LRRC37A/B like protein 1 C-terminal domain
55	PF14914	human	LRRC37A/B like protein 1 C-terminal domain
3	PF14914	chimp	LRRC37A/B like protein 1 C-terminal domain
3	PF14914	bonobo	LRRC37A/B like protein 1 C-terminal domain
17	PF14881	human	Tubulin domain
6	PF14881	chimp	Tubulin domain
5	PF14881	Dpseudo	Tubulin domain
16	PF14874	human	Flagellar-associated PapD-like
5	PF14874	chimp	Flagellar-associated PapD-like
5	PF14822	orang	Vasohibin	GO:regulation of angiogenesis ; GO:0045765 GO:cytoplasm ; GO:0005737
15	PF14822	human	Vasohibin	GO:regulation of angiogenesis ; GO:0045765 GO:cytoplasm ; GO:0005737
3	PF14822	gorilla	Vasohibin	GO:regulation of angiogenesis ; GO:0045765 GO:cytoplasm ; GO:0005737
6	PF14822	chimp	Vasohibin	GO:regulation of angiogenesis ; GO:0045765 GO:cytoplasm ; GO:0005737
2	PF14822	bonobo	Vasohibin	GO:regulation of angiogenesis ; GO:0045765 GO:cytoplasm ; GO:0005737
14	PF14815	human	NUDIX domain
5	PF14815	gorilla	NUDIX domain
12	PF14815	chimp	NUDIX domain
11	PF14815	bonobo	NUDIX domain
12	PF14776	human	Cation-channel complex subunit UNC-79
15	PF14776	chimp	Cation-channel complex subunit UNC-79
8	PF14776	bonobo	Cation-channel complex subunit UNC-79
2	PF14776	angaria	Cation-channel complex subunit UNC-79
5	PF14776	Dpseudo	Cation-channel complex subunit UNC-79
5	PF14776	Dmelano	Cation-channel complex subunit UNC-79
4	PF14776	Derecta	Cation-channel complex subunit UNC-79
33	PF14747	remanei	Domain of unknown function (DUF4473)
20	PF14747	japonica	Domain of unknown function (DUF4473)
23	PF14747	elegans	Domain of unknown function (DUF4473)
39	PF14747	briggsae	Domain of unknown function (DUF4473)
28	PF14747	brenneri	Domain of unknown function (DUF4473)
2	PF14747	angaria	Domain of unknown function (DUF4473)
19	PF14739	human	Domain of unknown function (DUF4472)
4	PF14739	bonobo	Domain of unknown function (DUF4472)
2	PF14652	remanei	Domain of unknown function (DUF4457)
3	PF14652	japonica	Domain of unknown function (DUF4457)
12	PF14652	human	Domain of unknown function (DUF4457)
9	PF14652	chimp	Domain of unknown function (DUF4457)
2	PF14652	brenneri	Domain of unknown function (DUF4457)
6	PF14652	bonobo	Domain of unknown function (DUF4457)
2	PF14652	angaria	Domain of unknown function (DUF4457)
70	PF14634	remanei	zinc-RING finger domain	GO:protein binding ; GO:0005515 GO:zinc ion binding ; GO:0008270
9	PF14634	orang	zinc-RING finger domain	GO:protein binding ; GO:0005515 GO:zinc ion binding ; GO:0008270
7	PF14634	japonica	zinc-RING finger domain	GO:protein binding ; GO:0005515 GO:zinc ion binding ; GO:0008270
23	PF14634	human	zinc-RING finger domain	GO:protein binding ; GO:0005515 GO:zinc ion binding ; GO:0008270
7	PF14634	gorilla	zinc-RING finger domain	GO:protein binding ; GO:0005515 GO:zinc ion binding ; GO:0008270
22	PF14634	elegans	zinc-RING finger domain	GO:protein binding ; GO:0005515 GO:zinc ion binding ; GO:0008270
9	PF14634	chimp	zinc-RING finger domain	GO:protein binding ; GO:0005515 GO:zinc ion binding ; GO:0008270
19	PF14634	briggsae	zinc-RING finger domain	GO:protein binding ; GO:0005515 GO:zinc ion binding ; GO:0008270
72	PF14634	brenneri	zinc-RING finger domain	GO:protein binding ; GO:0005515 GO:zinc ion binding ; GO:0008270
12	PF14634	bonobo	zinc-RING finger domain	GO:protein binding ; GO:0005515 GO:zinc ion binding ; GO:0008270
3	PF14634	angaria	zinc-RING finger domain	GO:protein binding ; GO:0005515 GO:zinc ion binding ; GO:0008270
4	PF14634	Dsimulans	zinc-RING finger domain	GO:protein binding ; GO:0005515 GO:zinc ion binding ; GO:0008270
3	PF14634	Dpseudo	zinc-RING finger domain	GO:protein binding ; GO:0005515 GO:zinc ion binding ; GO:0008270
4	PF14634	Dmelano	zinc-RING finger domain	GO:protein binding ; GO:0005515 GO:zinc ion binding ; GO:0008270
3	PF14634	Derecta	zinc-RING finger domain	GO:protein binding ; GO:0005515 GO:zinc ion binding ; GO:0008270
13	PF14619	human	Snf2-ATP coupling	GO:histone binding ; GO:0042393
4	PF14619	gorilla	Snf2-ATP coupling	GO:histone binding ; GO:0042393
2	PF14619	chimp	Snf2-ATP coupling	GO:histone binding ; GO:0042393
2	PF14619	brenneri	Snf2-ATP coupling	GO:histone binding ; GO:0042393
10	PF14619	bonobo	Snf2-ATP coupling	GO:histone binding ; GO:0042393
4	PF14619	angaria	Snf2-ATP coupling	GO:histone binding ; GO:0042393
2	PF14619	Dpseudo	Snf2-ATP coupling	GO:histone binding ; GO:0042393
4	PF14619	Dmelano	Snf2-ATP coupling	GO:histone binding ; GO:0042393
11	PF14608	orang	Zinc finger C-x8-C-x5-C-x3-H type
20	PF14608	human	Zinc finger C-x8-C-x5-C-x3-H type
4	PF14608	gorilla	Zinc finger C-x8-C-x5-C-x3-H type
5	PF14608	chimp	Zinc finger C-x8-C-x5-C-x3-H type
9	PF14608	bonobo	Zinc finger C-x8-C-x5-C-x3-H type
2	PF14608	Dpseudo	Zinc finger C-x8-C-x5-C-x3-H type
28	PF14529	remanei	Endonuclease-reverse transcriptase
74	PF14529	japonica	Endonuclease-reverse transcriptase
5	PF14529	brenneri	Endonuclease-reverse transcriptase
4	PF14529	angaria	Endonuclease-reverse transcriptase
13	PF14438	orang	Ataxin 2 SM domain
24	PF14438	human	Ataxin 2 SM domain
6	PF14438	gorilla	Ataxin 2 SM domain
3	PF14438	elegans	Ataxin 2 SM domain
2	PF14438	chimp	Ataxin 2 SM domain
2	PF14438	bonobo	Ataxin 2 SM domain
2	PF14438	angaria	Ataxin 2 SM domain
2	PF14438	Dpseudo	Ataxin 2 SM domain
3	PF14438	Dmelano	Ataxin 2 SM domain
2	PF14438	Derecta	Ataxin 2 SM domain
2	PF14377	japonica	Domain of unknown function (DUF4414)
14	PF14377	human	Domain of unknown function (DUF4414)
8	PF14377	elegans	Domain of unknown function (DUF4414)
6	PF14377	chimp	Domain of unknown function (DUF4414)
2	PF14377	brenneri	Domain of unknown function (DUF4414)
9	PF14377	bonobo	Domain of unknown function (DUF4414)
3	PF14377	angaria	Domain of unknown function (DUF4414)
4	PF14377	Dpseudo	Domain of unknown function (DUF4414)
7	PF14377	Dmelano	Domain of unknown function (DUF4414)
3	PF14228	japonica	Cell morphogenesis central region
9	PF14228	human	Cell morphogenesis central region
2	PF14228	gorilla	Cell morphogenesis central region
13	PF14228	chimp	Cell morphogenesis central region
7	PF14228	bonobo	Cell morphogenesis central region
15	PF14228	Dsimulans	Cell morphogenesis central region
8	PF14228	Dmelano	Cell morphogenesis central region
12	PF14228	Derecta	Cell morphogenesis central region
26	PF14214	remanei	Helitron helicase-like domain at N-terminus
21	PF14214	japonica	Helitron helicase-like domain at N-terminus
5	PF14214	elegans	Helitron helicase-like domain at N-terminus
2	PF14214	briggsae	Helitron helicase-like domain at N-terminus
19	PF14214	brenneri	Helitron helicase-like domain at N-terminus
2	PF14214	angaria	Helitron helicase-like domain at N-terminus
10	PF13927	remanei	Immunoglobulin domain
16	PF13927	japonica	Immunoglobulin domain
35	PF13927	elegans	Immunoglobulin domain
12	PF13927	briggsae	Immunoglobulin domain
14	PF13927	brenneri	Immunoglobulin domain
8	PF13927	angaria	Immunoglobulin domain
68	PF13927	Dsimulans	Immunoglobulin domain
90	PF13927	Dpseudo	Immunoglobulin domain
48	PF13927	Derecta	Immunoglobulin domain
9	PF13889	human	Chromosome segregation during meiosis
6	PF13889	chimp	Chromosome segregation during meiosis
4	PF13889	bonobo	Chromosome segregation during meiosis
4	PF13815	orang	Iguana/Dzip1-like DAZ-interacting protein N-terminal
19	PF13815	human	Iguana/Dzip1-like DAZ-interacting protein N-terminal
3	PF13815	gorilla	Iguana/Dzip1-like DAZ-interacting protein N-terminal
4	PF13815	chimp	Iguana/Dzip1-like DAZ-interacting protein N-terminal
2	PF13815	bonobo	Iguana/Dzip1-like DAZ-interacting protein N-terminal
3	PF13815	Dpseudo	Iguana/Dzip1-like DAZ-interacting protein N-terminal
2	PF13757	orang	Vault protein inter-alpha-trypsin domain
12	PF13757	human	Vault protein inter-alpha-trypsin domain
2	PF13757	gorilla	Vault protein inter-alpha-trypsin domain
2	PF13757	chimp	Vault protein inter-alpha-trypsin domain
5	PF13757	bonobo	Vault protein inter-alpha-trypsin domain
3	PF13692	orang	Glycosyl transferases group 1
13	PF13692	human	Glycosyl transferases group 1
3	PF13692	gorilla	Glycosyl transferases group 1
17	PF13692	chimp	Glycosyl transferases group 1
8	PF13692	bonobo	Glycosyl transferases group 1
3	PF13692	angaria	Glycosyl transferases group 1
71	PF13650	remanei	Aspartyl protease
3	PF13650	elegans	Aspartyl protease
4	PF13650	briggsae	Aspartyl protease
36	PF13650	brenneri	Aspartyl protease
3	PF13650	angaria	Aspartyl protease
5	PF13634	remanei	Nucleoporin FG repeat region
7	PF13634	japonica	Nucleoporin FG repeat region
6	PF13634	human	Nucleoporin FG repeat region
3	PF13634	gorilla	Nucleoporin FG repeat region
6	PF13634	elegans	Nucleoporin FG repeat region
2	PF13634	chimp	Nucleoporin FG repeat region
4	PF13634	briggsae	Nucleoporin FG repeat region
6	PF13634	brenneri	Nucleoporin FG repeat region
8	PF13634	angaria	Nucleoporin FG repeat region
2	PF13634	Dsimulans	Nucleoporin FG repeat region
2	PF13634	Dmelano	Nucleoporin FG repeat region
2	PF13634	Derecta	Nucleoporin FG repeat region
95	PF13518	japonica	Helix-turn-helix domain
7	PF13518	briggsae	Helix-turn-helix domain
22	PF13445	remanei	RING-type zinc-finger
13	PF13445	orang	RING-type zinc-finger
7	PF13445	japonica	RING-type zinc-finger
30	PF13445	human	RING-type zinc-finger
13	PF13445	gorilla	RING-type zinc-finger
6	PF13445	elegans	RING-type zinc-finger
13	PF13445	chimp	RING-type zinc-finger
10	PF13445	briggsae	RING-type zinc-finger
15	PF13445	brenneri	RING-type zinc-finger
13	PF13445	bonobo	RING-type zinc-finger
4	PF13445	angaria	RING-type zinc-finger
76	PF13431	human	Tetratricopeptide repeat
5	PF13431	gorilla	Tetratricopeptide repeat
19	PF13431	chimp	Tetratricopeptide repeat
9	PF13431	bonobo	Tetratricopeptide repeat
22	PF13383	remanei	Methyltransferase domain
4	PF13383	japonica	Methyltransferase domain
6	PF13383	elegans	Methyltransferase domain
2	PF13383	briggsae	Methyltransferase domain
6	PF13383	brenneri	Methyltransferase domain
2	PF13383	angaria	Methyltransferase domain
22	PF13378	human	Enolase C-terminal domain-like
2	PF13378	gorilla	Enolase C-terminal domain-like
5	PF13378	chimp	Enolase C-terminal domain-like
3	PF13378	bonobo	Enolase C-terminal domain-like
5	PF13378	angaria	Enolase C-terminal domain-like
5	PF13359	remanei	DDE superfamily endonuclease
41	PF13359	japonica	DDE superfamily endonuclease
2	PF13359	human	DDE superfamily endonuclease
5	PF13359	brenneri	DDE superfamily endonuclease
5	PF13359	Dsimulans	DDE superfamily endonuclease
9	PF13359	Dpseudo	DDE superfamily endonuclease
5	PF13359	Dmelano	DDE superfamily endonuclease
6	PF13359	Derecta	DDE superfamily endonuclease
42	PF13358	remanei	DDE superfamily endonuclease
7	PF13358	briggsae	DDE superfamily endonuclease
6	PF13358	brenneri	DDE superfamily endonuclease
7	PF13358	angaria	DDE superfamily endonuclease
8	PF12937	remanei	F-box-like	GO:protein binding ; GO:0005515
67	PF12937	orang	F-box-like	GO:protein binding ; GO:0005515
7	PF12937	japonica	F-box-like	GO:protein binding ; GO:0005515
62	PF12937	gorilla	F-box-like	GO:protein binding ; GO:0005515
15	PF12937	elegans	F-box-like	GO:protein binding ; GO:0005515
81	PF12937	chimp	F-box-like	GO:protein binding ; GO:0005515
4	PF12937	briggsae	F-box-like	GO:protein binding ; GO:0005515
11	PF12937	brenneri	F-box-like	GO:protein binding ; GO:0005515
76	PF12937	bonobo	F-box-like	GO:protein binding ; GO:0005515
8	PF12937	angaria	F-box-like	GO:protein binding ; GO:0005515
20	PF12937	Dsimulans	F-box-like	GO:protein binding ; GO:0005515
23	PF12937	Dpseudo	F-box-like	GO:protein binding ; GO:0005515
27	PF12937	Dmelano	F-box-like	GO:protein binding ; GO:0005515
23	PF12937	Derecta	F-box-like	GO:protein binding ; GO:0005515
2	PF12932	remanei	Vesicle coat trafficking protein Sec16 mid-region
2	PF12932	orang	Vesicle coat trafficking protein Sec16 mid-region
2	PF12932	japonica	Vesicle coat trafficking protein Sec16 mid-region
16	PF12932	human	Vesicle coat trafficking protein Sec16 mid-region
2	PF12932	gorilla	Vesicle coat trafficking protein Sec16 mid-region
5	PF12932	elegans	Vesicle coat trafficking protein Sec16 mid-region
2	PF12932	chimp	Vesicle coat trafficking protein Sec16 mid-region
2	PF12932	briggsae	Vesicle coat trafficking protein Sec16 mid-region
2	PF12932	brenneri	Vesicle coat trafficking protein Sec16 mid-region
9	PF12932	bonobo	Vesicle coat trafficking protein Sec16 mid-region
3	PF12932	angaria	Vesicle coat trafficking protein Sec16 mid-region
3	PF12872	orang	OST-HTH/LOTUS domain
17	PF12872	human	OST-HTH/LOTUS domain
5	PF12872	gorilla	OST-HTH/LOTUS domain
12	PF12872	chimp	OST-HTH/LOTUS domain
11	PF12872	bonobo	OST-HTH/LOTUS domain
3	PF12872	Dsimulans	OST-HTH/LOTUS domain
5	PF12872	Dpseudo	OST-HTH/LOTUS domain
6	PF12872	Dmelano	OST-HTH/LOTUS domain
3	PF12872	Derecta	OST-HTH/LOTUS domain
2	PF12833	remanei	Helix-turn-helix domain	GO:transcription factor activity
23	PF12833	angaria	Helix-turn-helix domain	GO:transcription factor activity
6	PF12632	orang	Mysoin-binding motif of peroxisomes	GO:myosin binding ; GO:0017022
15	PF12632	human	Mysoin-binding motif of peroxisomes	GO:myosin binding ; GO:0017022
12	PF12632	chimp	Mysoin-binding motif of peroxisomes	GO:myosin binding ; GO:0017022
8	PF12632	bonobo	Mysoin-binding motif of peroxisomes	GO:myosin binding ; GO:0017022
16	PF12612	human	Tubulin folding cofactor D C terminal
2	PF12612	gorilla	Tubulin folding cofactor D C terminal
2	PF12595	orang	Rhomboid serine protease
8	PF12595	human	Rhomboid serine protease
4	PF12595	gorilla	Rhomboid serine protease
9	PF12595	chimp	Rhomboid serine protease
3	PF12595	bonobo	Rhomboid serine protease
2	PF12540	orang	Protein of unknown function (DUF3736)
13	PF12540	human	Protein of unknown function (DUF3736)
2	PF12540	gorilla	Protein of unknown function (DUF3736)
6	PF12540	bonobo	Protein of unknown function (DUF3736)
4	PF12540	Dsimulans	Protein of unknown function (DUF3736)
3	PF12540	Dpseudo	Protein of unknown function (DUF3736)
5	PF12540	Dmelano	Protein of unknown function (DUF3736)
4	PF12540	Derecta	Protein of unknown function (DUF3736)
16	PF12510	human	Smoothelin cytoskeleton protein
5	PF12510	gorilla	Smoothelin cytoskeleton protein
7	PF12510	bonobo	Smoothelin cytoskeleton protein
19	PF12510	Dsimulans	Smoothelin cytoskeleton protein
11	PF12510	Dpseudo	Smoothelin cytoskeleton protein
17	PF12510	Dmelano	Smoothelin cytoskeleton protein
12	PF12510	Derecta	Smoothelin cytoskeleton protein
15	PF12478	orang	Ubiquitin-associated protein 2
18	PF12478	human	Ubiquitin-associated protein 2
3	PF12478	gorilla	Ubiquitin-associated protein 2
30	PF12478	chimp	Ubiquitin-associated protein 2
23	PF12478	bonobo	Ubiquitin-associated protein 2
8	PF12478	Dpseudo	Ubiquitin-associated protein 2
8	PF12478	Dmelano	Ubiquitin-associated protein 2
10	PF12478	Derecta	Ubiquitin-associated protein 2
2	PF12448	orang	Kinesin associated protein
20	PF12448	human	Kinesin associated protein
4	PF12448	gorilla	Kinesin associated protein
2	PF12448	chimp	Kinesin associated protein
2	PF12448	brenneri	Kinesin associated protein
9	PF12448	bonobo	Kinesin associated protein
4	PF12448	Dsimulans	Kinesin associated protein
4	PF12448	Dpseudo	Kinesin associated protein
4	PF12448	Dmelano	Kinesin associated protein
4	PF12448	Derecta	Kinesin associated protein
13	PF12414	orang	Calcitonin gene-related peptide regulator C terminal
57	PF12414	human	Calcitonin gene-related peptide regulator C terminal
5	PF12414	gorilla	Calcitonin gene-related peptide regulator C terminal
38	PF12414	chimp	Calcitonin gene-related peptide regulator C terminal
38	PF12414	bonobo	Calcitonin gene-related peptide regulator C terminal
10	PF12403	orang	Paired-box protein 2 C terminal
21	PF12403	human	Paired-box protein 2 C terminal
3	PF12403	gorilla	Paired-box protein 2 C terminal
14	PF12403	chimp	Paired-box protein 2 C terminal
23	PF12403	bonobo	Paired-box protein 2 C terminal
3	PF12394	orang	Protein of unknown function (DUF3657)
16	PF12394	human	Protein of unknown function (DUF3657)
3	PF12394	gorilla	Protein of unknown function (DUF3657)
3	PF12394	chimp	Protein of unknown function (DUF3657)
12	PF12394	bonobo	Protein of unknown function (DUF3657)
3	PF12394	Dmelano	Protein of unknown function (DUF3657)
2	PF12394	Derecta	Protein of unknown function (DUF3657)
9	PF12355	Dsimulans	Down syndrome cell adhesion molecule C terminal
15	PF12355	Dpseudo	Down syndrome cell adhesion molecule C terminal
75	PF12355	Dmelano	Down syndrome cell adhesion molecule C terminal
5	PF12348	remanei	CLASP N terminal
4	PF12348	orang	CLASP N terminal
5	PF12348	japonica	CLASP N terminal
67	PF12348	human	CLASP N terminal
11	PF12348	gorilla	CLASP N terminal
10	PF12348	elegans	CLASP N terminal
49	PF12348	chimp	CLASP N terminal
5	PF12348	briggsae	CLASP N terminal
5	PF12348	brenneri	CLASP N terminal
24	PF12348	bonobo	CLASP N terminal
5	PF12348	angaria	CLASP N terminal
9	PF12348	Dsimulans	CLASP N terminal
8	PF12348	Dpseudo	CLASP N terminal
7	PF12348	Dmelano	CLASP N terminal
9	PF12348	Derecta	CLASP N terminal
2	PF12287	orang	Cytoplasmic activation/proliferation-associated protein-1 C term
22	PF12287	human	Cytoplasmic activation/proliferation-associated protein-1 C term
6	PF12287	gorilla	Cytoplasmic activation/proliferation-associated protein-1 C term
17	PF12287	chimp	Cytoplasmic activation/proliferation-associated protein-1 C term
16	PF12287	bonobo	Cytoplasmic activation/proliferation-associated protein-1 C term
3	PF12203	orang	Glutamine rich N terminal domain of histone deacetylase 4
45	PF12203	human	Glutamine rich N terminal domain of histone deacetylase 4
6	PF12203	gorilla	Glutamine rich N terminal domain of histone deacetylase 4
32	PF12203	chimp	Glutamine rich N terminal domain of histone deacetylase 4
12	PF12203	bonobo	Glutamine rich N terminal domain of histone deacetylase 4
2	PF12202	remanei	Oxidative-stress-responsive kinase 1 C terminal	GO:protein serine/threonine kinase activity ; GO:0004674 GO:ATP binding ; GO:0005524
13	PF12202	orang	Oxidative-stress-responsive kinase 1 C terminal	GO:protein serine/threonine kinase activity ; GO:0004674 GO:ATP binding ; GO:0005524
2	PF12202	japonica	Oxidative-stress-responsive kinase 1 C terminal	GO:protein serine/threonine kinase activity ; GO:0004674 GO:ATP binding ; GO:0005524
59	PF12202	human	Oxidative-stress-responsive kinase 1 C terminal	GO:protein serine/threonine kinase activity ; GO:0004674 GO:ATP binding ; GO:0005524
8	PF12202	gorilla	Oxidative-stress-responsive kinase 1 C terminal	GO:protein serine/threonine kinase activity ; GO:0004674 GO:ATP binding ; GO:0005524
22	PF12202	elegans	Oxidative-stress-responsive kinase 1 C terminal	GO:protein serine/threonine kinase activity ; GO:0004674 GO:ATP binding ; GO:0005524
14	PF12202	chimp	Oxidative-stress-responsive kinase 1 C terminal	GO:protein serine/threonine kinase activity ; GO:0004674 GO:ATP binding ; GO:0005524
2	PF12202	briggsae	Oxidative-stress-responsive kinase 1 C terminal	GO:protein serine/threonine kinase activity ; GO:0004674 GO:ATP binding ; GO:0005524
3	PF12202	brenneri	Oxidative-stress-responsive kinase 1 C terminal	GO:protein serine/threonine kinase activity ; GO:0004674 GO:ATP binding ; GO:0005524
8	PF12202	bonobo	Oxidative-stress-responsive kinase 1 C terminal	GO:protein serine/threonine kinase activity ; GO:0004674 GO:ATP binding ; GO:0005524
2	PF12202	angaria	Oxidative-stress-responsive kinase 1 C terminal	GO:protein serine/threonine kinase activity ; GO:0004674 GO:ATP binding ; GO:0005524
3	PF12202	Dsimulans	Oxidative-stress-responsive kinase 1 C terminal	GO:protein serine/threonine kinase activity ; GO:0004674 GO:ATP binding ; GO:0005524
2	PF12202	Dpseudo	Oxidative-stress-responsive kinase 1 C terminal	GO:protein serine/threonine kinase activity ; GO:0004674 GO:ATP binding ; GO:0005524
4	PF12202	Dmelano	Oxidative-stress-responsive kinase 1 C terminal	GO:protein serine/threonine kinase activity ; GO:0004674 GO:ATP binding ; GO:0005524
2	PF12202	Derecta	Oxidative-stress-responsive kinase 1 C terminal	GO:protein serine/threonine kinase activity ; GO:0004674 GO:ATP binding ; GO:0005524
10	PF12185	human	Nup358/RanBP2 E3 ligase domain
6	PF12185	chimp	Nup358/RanBP2 E3 ligase domain
9	PF12126	human	Protein of unknown function (DUF3583)
5	PF12126	gorilla	Protein of unknown function (DUF3583)
11	PF12126	chimp	Protein of unknown function (DUF3583)
11	PF12126	bonobo	Protein of unknown function (DUF3583)
40	PF12078	elegans	Domain of unknown function (DUF3557)
35	PF12078	briggsae	Domain of unknown function (DUF3557)
95	PF12078	brenneri	Domain of unknown function (DUF3557)
28	PF12064	human	Domain of unknown function (DUF3544)
6	PF12064	gorilla	Domain of unknown function (DUF3544)
30	PF12064	chimp	Domain of unknown function (DUF3544)
28	PF12064	bonobo	Domain of unknown function (DUF3544)
12	PF12057	orang	Domain of unknown function (DUF3538)
34	PF12057	human	Domain of unknown function (DUF3538)
3	PF12057	gorilla	Domain of unknown function (DUF3538)
10	PF12057	bonobo	Domain of unknown function (DUF3538)
16	PF12057	Dsimulans	Domain of unknown function (DUF3538)
5	PF12057	Dpseudo	Domain of unknown function (DUF3538)
8	PF12057	Dmelano	Domain of unknown function (DUF3538)
6	PF12057	Derecta	Domain of unknown function (DUF3538)
2	PF12053	remanei	Domain of unknown function (DUF3534)
2	PF12053	orang	Domain of unknown function (DUF3534)
41	PF12053	human	Domain of unknown function (DUF3534)
3	PF12053	gorilla	Domain of unknown function (DUF3534)
11	PF12053	elegans	Domain of unknown function (DUF3534)
26	PF12053	chimp	Domain of unknown function (DUF3534)
2	PF12053	bonobo	Domain of unknown function (DUF3534)
4	PF12053	Dpseudo	Domain of unknown function (DUF3534)
4	PF12053	Dmelano	Domain of unknown function (DUF3534)
3	PF12053	Derecta	Domain of unknown function (DUF3534)
11	PF12038	human	Domain of unknown function (DUF3524)
2	PF12038	gorilla	Domain of unknown function (DUF3524)
12	PF12038	chimp	Domain of unknown function (DUF3524)
6	PF12038	bonobo	Domain of unknown function (DUF3524)
2	PF12038	Dsimulans	Domain of unknown function (DUF3524)
3	PF12004	orang	Domain of unknown function (DUF3498)
19	PF12004	human	Domain of unknown function (DUF3498)
5	PF12004	gorilla	Domain of unknown function (DUF3498)
24	PF12004	chimp	Domain of unknown function (DUF3498)
15	PF12004	bonobo	Domain of unknown function (DUF3498)
12	PF12004	Dsimulans	Domain of unknown function (DUF3498)
9	PF12004	Dmelano	Domain of unknown function (DUF3498)
3	PF12004	Derecta	Domain of unknown function (DUF3498)
8	PF12001	orang	Domain of unknown function (DUF3496)
37	PF12001	human	Domain of unknown function (DUF3496)
5	PF12001	gorilla	Domain of unknown function (DUF3496)
27	PF12001	chimp	Domain of unknown function (DUF3496)
2	PF12001	bonobo	Domain of unknown function (DUF3496)
10	PF11933	orang	Domain of unknown function (DUF3451)
33	PF11933	human	Domain of unknown function (DUF3451)
14	PF11933	gorilla	Domain of unknown function (DUF3451)
18	PF11933	chimp	Domain of unknown function (DUF3451)
13	PF11933	bonobo	Domain of unknown function (DUF3451)
56	PF11933	Dmelano	Domain of unknown function (DUF3451)
63	PF11933	Derecta	Domain of unknown function (DUF3451)
13	PF11608	human	Limkain b1
6	PF11608	chimp	Limkain b1
7	PF11608	bonobo	Limkain b1
9	PF11427	remanei	Tc3 transposase	GO:DNA binding ; GO:0003677
6	PF11427	briggsae	Tc3 transposase	GO:DNA binding ; GO:0003677
2	PF11427	angaria	Tc3 transposase	GO:DNA binding ; GO:0003677
8	PF11357	orang	Cell cycle regulatory protein
41	PF11357	human	Cell cycle regulatory protein
14	PF11357	gorilla	Cell cycle regulatory protein
59	PF11357	chimp	Cell cycle regulatory protein
4	PF11357	bonobo	Cell cycle regulatory protein
4	PF10602	remanei	26S proteasome subunit RPN7
3	PF10602	orang	26S proteasome subunit RPN7
2	PF10602	japonica	26S proteasome subunit RPN7
27	PF10602	human	26S proteasome subunit RPN7
3	PF10602	gorilla	26S proteasome subunit RPN7
2	PF10602	elegans	26S proteasome subunit RPN7
2	PF10602	chimp	26S proteasome subunit RPN7
2	PF10602	briggsae	26S proteasome subunit RPN7
3	PF10602	brenneri	26S proteasome subunit RPN7
5	PF10602	bonobo	26S proteasome subunit RPN7
3	PF10602	angaria	26S proteasome subunit RPN7
3	PF10602	Dsimulans	26S proteasome subunit RPN7
4	PF10602	Dpseudo	26S proteasome subunit RPN7
3	PF10602	Dmelano	26S proteasome subunit RPN7
3	PF10602	Derecta	26S proteasome subunit RPN7
2	PF10495	orang	Pericentrin-AKAP-450 domain of centrosomal targeting protein
20	PF10495	human	Pericentrin-AKAP-450 domain of centrosomal targeting protein
2	PF10495	gorilla	Pericentrin-AKAP-450 domain of centrosomal targeting protein
22	PF10495	chimp	Pericentrin-AKAP-450 domain of centrosomal targeting protein
8	PF10495	bonobo	Pericentrin-AKAP-450 domain of centrosomal targeting protein
21	PF10495	Dsimulans	Pericentrin-AKAP-450 domain of centrosomal targeting protein
13	PF10495	Dpseudo	Pericentrin-AKAP-450 domain of centrosomal targeting protein
12	PF10495	Dmelano	Pericentrin-AKAP-450 domain of centrosomal targeting protein
9	PF10495	Derecta	Pericentrin-AKAP-450 domain of centrosomal targeting protein
4	PF10486	orang	Phosphoinositide 3-kinase gamma adapter protein p101 subunit	GO:1-phosphatidylinositol-3-kinase regulator activity ; GO:0046935 GO:phosphatidylinositol 3-kinase complex
16	PF10486	human	Phosphoinositide 3-kinase gamma adapter protein p101 subunit	GO:1-phosphatidylinositol-3-kinase regulator activity ; GO:0046935 GO:phosphatidylinositol 3-kinase complex
2	PF10486	gorilla	Phosphoinositide 3-kinase gamma adapter protein p101 subunit	GO:1-phosphatidylinositol-3-kinase regulator activity ; GO:0046935 GO:phosphatidylinositol 3-kinase complex
2	PF10486	chimp	Phosphoinositide 3-kinase gamma adapter protein p101 subunit	GO:1-phosphatidylinositol-3-kinase regulator activity ; GO:0046935 GO:phosphatidylinositol 3-kinase complex
3	PF10486	bonobo	Phosphoinositide 3-kinase gamma adapter protein p101 subunit	GO:1-phosphatidylinositol-3-kinase regulator activity ; GO:0046935 GO:phosphatidylinositol 3-kinase complex
2	PF10479	japonica	Fragile site-associated protein C-terminus
13	PF10479	human	Fragile site-associated protein C-terminus
4	PF10479	elegans	Fragile site-associated protein C-terminus
11	PF10479	chimp	Fragile site-associated protein C-terminus
4	PF10479	bonobo	Fragile site-associated protein C-terminus
9	PF10479	Dsimulans	Fragile site-associated protein C-terminus
3	PF10479	Dpseudo	Fragile site-associated protein C-terminus
6	PF10479	Dmelano	Fragile site-associated protein C-terminus
4	PF10479	Derecta	Fragile site-associated protein C-terminus
69	PF10328	japonica	Serpentine type 7TM GPCR chemoreceptor Srx
68	PF10328	brenneri	Serpentine type 7TM GPCR chemoreceptor Srx
40	PF10328	angaria	Serpentine type 7TM GPCR chemoreceptor Srx
82	PF10327	remanei	Serpentine type 7TM GPCR chemoreceptor Sri
19	PF10327	japonica	Serpentine type 7TM GPCR chemoreceptor Sri
71	PF10327	elegans	Serpentine type 7TM GPCR chemoreceptor Sri
56	PF10327	briggsae	Serpentine type 7TM GPCR chemoreceptor Sri
48	PF10327	brenneri	Serpentine type 7TM GPCR chemoreceptor Sri
20	PF10327	angaria	Serpentine type 7TM GPCR chemoreceptor Sri
80	PF10325	elegans	Serpentine type 7TM GPCR chemoreceptor Srz
48	PF10325	briggsae	Serpentine type 7TM GPCR chemoreceptor Srz
79	PF10325	brenneri	Serpentine type 7TM GPCR chemoreceptor Srz
4	PF10325	angaria	Serpentine type 7TM GPCR chemoreceptor Srz
72	PF10324	japonica	Serpentine type 7TM GPCR chemoreceptor Srw
33	PF10324	angaria	Serpentine type 7TM GPCR chemoreceptor Srw
5	PF10324	Dsimulans	Serpentine type 7TM GPCR chemoreceptor Srw
6	PF10324	Dpseudo	Serpentine type 7TM GPCR chemoreceptor Srw
7	PF10324	Dmelano	Serpentine type 7TM GPCR chemoreceptor Srw
6	PF10324	Derecta	Serpentine type 7TM GPCR chemoreceptor Srw
56	PF10323	remanei	Serpentine type 7TM GPCR chemoreceptor Srv
25	PF10323	japonica	Serpentine type 7TM GPCR chemoreceptor Srv
34	PF10323	elegans	Serpentine type 7TM GPCR chemoreceptor Srv
31	PF10323	briggsae	Serpentine type 7TM GPCR chemoreceptor Srv
33	PF10323	brenneri	Serpentine type 7TM GPCR chemoreceptor Srv
6	PF10323	angaria	Serpentine type 7TM GPCR chemoreceptor Srv
15	PF10322	japonica	Serpentine type 7TM GPCR chemoreceptor Sru
51	PF10322	elegans	Serpentine type 7TM GPCR chemoreceptor Sru
37	PF10322	briggsae	Serpentine type 7TM GPCR chemoreceptor Sru
58	PF10322	brenneri	Serpentine type 7TM GPCR chemoreceptor Sru
5	PF10322	angaria	Serpentine type 7TM GPCR chemoreceptor Sru
81	PF10321	remanei	Serpentine type 7TM GPCR chemoreceptor Srt
18	PF10321	japonica	Serpentine type 7TM GPCR chemoreceptor Srt
73	PF10321	elegans	Serpentine type 7TM GPCR chemoreceptor Srt
51	PF10321	briggsae	Serpentine type 7TM GPCR chemoreceptor Srt
74	PF10321	brenneri	Serpentine type 7TM GPCR chemoreceptor Srt
21	PF10321	angaria	Serpentine type 7TM GPCR chemoreceptor Srt
39	PF10319	remanei	Serpentine type 7TM GPCR chemoreceptor Srj
23	PF10319	japonica	Serpentine type 7TM GPCR chemoreceptor Srj
44	PF10319	elegans	Serpentine type 7TM GPCR chemoreceptor Srj
35	PF10319	briggsae	Serpentine type 7TM GPCR chemoreceptor Srj
40	PF10319	brenneri	Serpentine type 7TM GPCR chemoreceptor Srj
20	PF10319	angaria	Serpentine type 7TM GPCR chemoreceptor Srj
98	PF10318	japonica	Serpentine type 7TM GPCR chemoreceptor Srh
43	PF10318	angaria	Serpentine type 7TM GPCR chemoreceptor Srh
43	PF10316	remanei	Serpentine type 7TM GPCR chemoreceptor Srbc
18	PF10316	japonica	Serpentine type 7TM GPCR chemoreceptor Srbc
90	PF10316	elegans	Serpentine type 7TM GPCR chemoreceptor Srbc
39	PF10316	briggsae	Serpentine type 7TM GPCR chemoreceptor Srbc
46	PF10316	brenneri	Serpentine type 7TM GPCR chemoreceptor Srbc
8	PF10316	angaria	Serpentine type 7TM GPCR chemoreceptor Srbc
37	PF10292	remanei	Serpentine type 7TM GPCR receptor class ab chemoreceptor
22	PF10292	japonica	Serpentine type 7TM GPCR receptor class ab chemoreceptor
35	PF10292	elegans	Serpentine type 7TM GPCR receptor class ab chemoreceptor
26	PF10292	briggsae	Serpentine type 7TM GPCR receptor class ab chemoreceptor
19	PF10292	brenneri	Serpentine type 7TM GPCR receptor class ab chemoreceptor
8	PF10292	angaria	Serpentine type 7TM GPCR receptor class ab chemoreceptor
2	PF10274	orang	Parkin co-regulated protein
31	PF10274	human	Parkin co-regulated protein
3	PF10274	gorilla	Parkin co-regulated protein
6	PF10274	chimp	Parkin co-regulated protein
2	PF10274	briggsae	Parkin co-regulated protein
4	PF10274	bonobo	Parkin co-regulated protein
2	PF10274	Dsimulans	Parkin co-regulated protein
3	PF10274	Dpseudo	Parkin co-regulated protein
2	PF10274	Dmelano	Parkin co-regulated protein
2	PF10274	Derecta	Parkin co-regulated protein
8	PF10174	orang	RIM-binding protein of the cytomatrix active zone	GO:presynaptic active zone ; GO:0048786
14	PF10174	human	RIM-binding protein of the cytomatrix active zone	GO:presynaptic active zone ; GO:0048786
4	PF10174	gorilla	RIM-binding protein of the cytomatrix active zone	GO:presynaptic active zone ; GO:0048786
21	PF10174	chimp	RIM-binding protein of the cytomatrix active zone	GO:presynaptic active zone ; GO:0048786
2	PF10174	briggsae	RIM-binding protein of the cytomatrix active zone	GO:presynaptic active zone ; GO:0048786
16	PF10174	bonobo	RIM-binding protein of the cytomatrix active zone	GO:presynaptic active zone ; GO:0048786
4	PF10174	angaria	RIM-binding protein of the cytomatrix active zone	GO:presynaptic active zone ; GO:0048786
18	PF10174	Dpseudo	RIM-binding protein of the cytomatrix active zone	GO:presynaptic active zone ; GO:0048786
7	PF10174	Dmelano	RIM-binding protein of the cytomatrix active zone	GO:presynaptic active zone ; GO:0048786
28	PF09738	orang	Double stranded RNA binding protein (DUF2051)
5	PF09738	japonica	Double stranded RNA binding protein (DUF2051)
81	PF09738	human	Double stranded RNA binding protein (DUF2051)
6	PF09738	gorilla	Double stranded RNA binding protein (DUF2051)
2	PF09738	elegans	Double stranded RNA binding protein (DUF2051)
50	PF09738	chimp	Double stranded RNA binding protein (DUF2051)
28	PF09738	bonobo	Double stranded RNA binding protein (DUF2051)
2	PF09738	angaria	Double stranded RNA binding protein (DUF2051)
4	PF09606	japonica	ARC105 or Med15 subunit of Mediator complex non-fungal	GO:RNA polymerase II transcription cofactor activity ; GO:0001104 GO:regulation of transcription from RNA polymerase II promoter ; GO:0006357 GO:mediator complex ; GO:0016592
13	PF09606	human	ARC105 or Med15 subunit of Mediator complex non-fungal	GO:RNA polymerase II transcription cofactor activity ; GO:0001104 GO:regulation of transcription from RNA polymerase II promoter ; GO:0006357 GO:mediator complex ; GO:0016592
6	PF09606	gorilla	ARC105 or Med15 subunit of Mediator complex non-fungal	GO:RNA polymerase II transcription cofactor activity ; GO:0001104 GO:regulation of transcription from RNA polymerase II promoter ; GO:0006357 GO:mediator complex ; GO:0016592
2	PF09606	elegans	ARC105 or Med15 subunit of Mediator complex non-fungal	GO:RNA polymerase II transcription cofactor activity ; GO:0001104 GO:regulation of transcription from RNA polymerase II promoter ; GO:0006357 GO:mediator complex ; GO:0016592
9	PF09606	chimp	ARC105 or Med15 subunit of Mediator complex non-fungal	GO:RNA polymerase II transcription cofactor activity ; GO:0001104 GO:regulation of transcription from RNA polymerase II promoter ; GO:0006357 GO:mediator complex ; GO:0016592
2	PF09606	briggsae	ARC105 or Med15 subunit of Mediator complex non-fungal	GO:RNA polymerase II transcription cofactor activity ; GO:0001104 GO:regulation of transcription from RNA polymerase II promoter ; GO:0006357 GO:mediator complex ; GO:0016592
2	PF09606	angaria	ARC105 or Med15 subunit of Mediator complex non-fungal	GO:RNA polymerase II transcription cofactor activity ; GO:0001104 GO:regulation of transcription from RNA polymerase II promoter ; GO:0006357 GO:mediator complex ; GO:0016592
2	PF09606	Dmelano	ARC105 or Med15 subunit of Mediator complex non-fungal	GO:RNA polymerase II transcription cofactor activity ; GO:0001104 GO:regulation of transcription from RNA polymerase II promoter ; GO:0006357 GO:mediator complex ; GO:0016592
5	PF09387	human	Mitochondrial RNA binding protein MRP
16	PF09387	chimp	Mitochondrial RNA binding protein MRP
9	PF09387	bonobo	Mitochondrial RNA binding protein MRP
12	PF09379	remanei	FERM N-terminal domain
47	PF09379	orang	FERM N-terminal domain
46	PF09379	japonica	FERM N-terminal domain
33	PF09379	gorilla	FERM N-terminal domain
24	PF09379	elegans	FERM N-terminal domain
10	PF09379	briggsae	FERM N-terminal domain
13	PF09379	brenneri	FERM N-terminal domain
14	PF09379	angaria	FERM N-terminal domain
36	PF09379	Dsimulans	FERM N-terminal domain
32	PF09379	Dpseudo	FERM N-terminal domain
35	PF09379	Dmelano	FERM N-terminal domain
29	PF09379	Derecta	FERM N-terminal domain
5	PF09279	remanei	Phosphoinositide-specific phospholipase C
22	PF09279	orang	Phosphoinositide-specific phospholipase C
8	PF09279	japonica	Phosphoinositide-specific phospholipase C
89	PF09279	human	Phosphoinositide-specific phospholipase C
18	PF09279	gorilla	Phosphoinositide-specific phospholipase C
36	PF09279	elegans	Phosphoinositide-specific phospholipase C
39	PF09279	chimp	Phosphoinositide-specific phospholipase C
5	PF09279	briggsae	Phosphoinositide-specific phospholipase C
7	PF09279	brenneri	Phosphoinositide-specific phospholipase C
34	PF09279	bonobo	Phosphoinositide-specific phospholipase C
8	PF09279	angaria	Phosphoinositide-specific phospholipase C
7	PF09279	Dsimulans	Phosphoinositide-specific phospholipase C
4	PF09279	Dpseudo	Phosphoinositide-specific phospholipase C
8	PF09279	Dmelano	Phosphoinositide-specific phospholipase C
6	PF09279	Derecta	Phosphoinositide-specific phospholipase C
18	PF09067	orang	Erythropoietin receptor
17	PF09067	human	Erythropoietin receptor
6	PF09067	gorilla	Erythropoietin receptor
5	PF09067	chimp	Erythropoietin receptor
6	PF09067	bonobo	Erythropoietin receptor
18	PF09058	human	L27_1
4	PF09058	gorilla	L27_1
21	PF09058	chimp	L27_1
10	PF09058	bonobo	L27_1
2	PF09058	angaria	L27_1
22	PF09058	Dsimulans	L27_1
2	PF09058	Dpseudo	L27_1
8	PF09058	Dmelano	L27_1
11	PF09058	Derecta	L27_1
2	PF09045	orang	L27_2
18	PF09045	human	L27_2
3	PF09045	gorilla	L27_2
15	PF09045	chimp	L27_2
12	PF09045	bonobo	L27_2
11	PF09042	human	Titin Z
2	PF08952	orang	Domain of unknown function (DUF1866)
13	PF08952	human	Domain of unknown function (DUF1866)
5	PF08952	gorilla	Domain of unknown function (DUF1866)
2	PF08952	elegans	Domain of unknown function (DUF1866)
22	PF08952	chimp	Domain of unknown function (DUF1866)
11	PF08952	bonobo	Domain of unknown function (DUF1866)
3	PF08880	remanei	QLQ	GO:ATP binding ; GO:0005524 GO:regulation of transcription
2	PF08880	japonica	QLQ	GO:ATP binding ; GO:0005524 GO:regulation of transcription
13	PF08880	human	QLQ	GO:ATP binding ; GO:0005524 GO:regulation of transcription
4	PF08880	gorilla	QLQ	GO:ATP binding ; GO:0005524 GO:regulation of transcription
2	PF08880	chimp	QLQ	GO:ATP binding ; GO:0005524 GO:regulation of transcription
2	PF08880	briggsae	QLQ	GO:ATP binding ; GO:0005524 GO:regulation of transcription
2	PF08880	brenneri	QLQ	GO:ATP binding ; GO:0005524 GO:regulation of transcription
9	PF08880	bonobo	QLQ	GO:ATP binding ; GO:0005524 GO:regulation of transcription
2	PF08880	angaria	QLQ	GO:ATP binding ; GO:0005524 GO:regulation of transcription
4	PF08880	Dmelano	QLQ	GO:ATP binding ; GO:0005524 GO:regulation of transcription
3	PF08788	orang	NHR2 domain like
18	PF08788	human	NHR2 domain like
8	PF08788	gorilla	NHR2 domain like
11	PF08788	chimp	NHR2 domain like
12	PF08788	bonobo	NHR2 domain like
3	PF08788	Dmelano	NHR2 domain like
3	PF08763	remanei	Voltage gated calcium channel IQ domain
6	PF08763	orang	Voltage gated calcium channel IQ domain
3	PF08763	japonica	Voltage gated calcium channel IQ domain
65	PF08763	human	Voltage gated calcium channel IQ domain
11	PF08763	gorilla	Voltage gated calcium channel IQ domain
6	PF08763	elegans	Voltage gated calcium channel IQ domain
10	PF08763	chimp	Voltage gated calcium channel IQ domain
2	PF08763	briggsae	Voltage gated calcium channel IQ domain
28	PF08763	bonobo	Voltage gated calcium channel IQ domain
2	PF08763	angaria	Voltage gated calcium channel IQ domain
43	PF08763	Dsimulans	Voltage gated calcium channel IQ domain
12	PF08763	Dpseudo	Voltage gated calcium channel IQ domain
24	PF08763	Dmelano	Voltage gated calcium channel IQ domain
2	PF08443	remanei	RimK-like ATP-grasp domain
2	PF08443	orang	RimK-like ATP-grasp domain
2	PF08443	japonica	RimK-like ATP-grasp domain
6	PF08443	human	RimK-like ATP-grasp domain
2	PF08443	gorilla	RimK-like ATP-grasp domain
2	PF08443	elegans	RimK-like ATP-grasp domain
2	PF08443	chimp	RimK-like ATP-grasp domain
2	PF08443	bonobo	RimK-like ATP-grasp domain
10	PF08397	orang	IRSp53/MIM homology domain	GO:plasma membrane organization ; GO:0007009
2	PF08397	japonica	IRSp53/MIM homology domain	GO:plasma membrane organization ; GO:0007009
50	PF08397	human	IRSp53/MIM homology domain	GO:plasma membrane organization ; GO:0007009
6	PF08397	gorilla	IRSp53/MIM homology domain	GO:plasma membrane organization ; GO:0007009
14	PF08397	chimp	IRSp53/MIM homology domain	GO:plasma membrane organization ; GO:0007009
12	PF08397	bonobo	IRSp53/MIM homology domain	GO:plasma membrane organization ; GO:0007009
2	PF08397	angaria	IRSp53/MIM homology domain	GO:plasma membrane organization ; GO:0007009
28	PF08397	Dsimulans	IRSp53/MIM homology domain	GO:plasma membrane organization ; GO:0007009
3	PF08397	Dpseudo	IRSp53/MIM homology domain	GO:plasma membrane organization ; GO:0007009
17	PF08397	Dmelano	IRSp53/MIM homology domain	GO:plasma membrane organization ; GO:0007009
11	PF08397	Derecta	IRSp53/MIM homology domain	GO:plasma membrane organization ; GO:0007009
22	PF08356	human	EF hand associated
2	PF08356	gorilla	EF hand associated
2	PF08356	chimp	EF hand associated
13	PF08356	bonobo	EF hand associated
3	PF08356	Dsimulans	EF hand associated
3	PF08356	Dpseudo	EF hand associated
3	PF08356	Dmelano	EF hand associated
3	PF08356	Derecta	EF hand associated
22	PF08355	human	EF hand associated
2	PF08355	gorilla	EF hand associated
2	PF08355	chimp	EF hand associated
13	PF08355	bonobo	EF hand associated
3	PF08355	Dsimulans	EF hand associated
3	PF08355	Dpseudo	EF hand associated
3	PF08355	Dmelano	EF hand associated
3	PF08355	Derecta	EF hand associated
2	PF08352	remanei	Oligopeptide/dipeptide transporter	GO:nucleotide binding ; GO:0000166 GO:ATP binding ; GO:0005524 GO:peptide transport ; GO:0015833
18	PF08352	angaria	Oligopeptide/dipeptide transporter	GO:nucleotide binding ; GO:0000166 GO:ATP binding ; GO:0005524 GO:peptide transport ; GO:0015833
44	PF08165	human	FerA (NUC095) domain	GO:integral component of membrane ; GO:0016021
17	PF08165	gorilla	FerA (NUC095) domain	GO:integral component of membrane ; GO:0016021
3	PF08165	elegans	FerA (NUC095) domain	GO:integral component of membrane ; GO:0016021
3	PF08165	chimp	FerA (NUC095) domain	GO:integral component of membrane ; GO:0016021
18	PF08165	bonobo	FerA (NUC095) domain	GO:integral component of membrane ; GO:0016021
2	PF07989	orang	Microtubule associated	GO:microtubule organizing center ; GO:0005815
25	PF07989	human	Microtubule associated	GO:microtubule organizing center ; GO:0005815
2	PF07989	gorilla	Microtubule associated	GO:microtubule organizing center ; GO:0005815
2	PF07989	chimp	Microtubule associated	GO:microtubule organizing center ; GO:0005815
3	PF07989	bonobo	Microtubule associated	GO:microtubule organizing center ; GO:0005815
8	PF07989	Dsimulans	Microtubule associated	GO:microtubule organizing center ; GO:0005815
4	PF07989	Dpseudo	Microtubule associated	GO:microtubule organizing center ; GO:0005815
10	PF07989	Dmelano	Microtubule associated	GO:microtubule organizing center ; GO:0005815
6	PF07989	Derecta	Microtubule associated	GO:microtubule organizing center ; GO:0005815
10	PF07975	human	TFIIH C1-like domain	GO:zinc ion binding ; GO:0008270 GO:DNA repair ; GO:0006281
4	PF07974	remanei	EGF-like domain
24	PF07974	orang	EGF-like domain
13	PF07974	japonica	EGF-like domain
88	PF07974	human	EGF-like domain
15	PF07974	gorilla	EGF-like domain
6	PF07974	elegans	EGF-like domain
52	PF07974	chimp	EGF-like domain
5	PF07974	briggsae	EGF-like domain
6	PF07974	brenneri	EGF-like domain
39	PF07974	bonobo	EGF-like domain
4	PF07974	angaria	EGF-like domain
6	PF07974	Dsimulans	EGF-like domain
7	PF07974	Dpseudo	EGF-like domain
11	PF07974	Dmelano	EGF-like domain
7	PF07974	Derecta	EGF-like domain
2	PF07969	japonica	Amidohydrolase family
32	PF07969	angaria	Amidohydrolase family
41	PF07738	remanei	Sad1 / UNC-like C-terminal
15	PF07738	orang	Sad1 / UNC-like C-terminal
5	PF07738	japonica	Sad1 / UNC-like C-terminal
33	PF07738	human	Sad1 / UNC-like C-terminal
8	PF07738	gorilla	Sad1 / UNC-like C-terminal
11	PF07738	elegans	Sad1 / UNC-like C-terminal
31	PF07738	chimp	Sad1 / UNC-like C-terminal
11	PF07738	briggsae	Sad1 / UNC-like C-terminal
22	PF07738	brenneri	Sad1 / UNC-like C-terminal
23	PF07738	bonobo	Sad1 / UNC-like C-terminal
4	PF07738	angaria	Sad1 / UNC-like C-terminal
7	PF07738	Dsimulans	Sad1 / UNC-like C-terminal
10	PF07738	Dpseudo	Sad1 / UNC-like C-terminal
6	PF07738	Dmelano	Sad1 / UNC-like C-terminal
5	PF07738	Derecta	Sad1 / UNC-like C-terminal
12	PF07735	japonica	F-box associated
77	PF07735	briggsae	F-box associated
16	PF07735	angaria	F-box associated
14	PF07707	remanei	BTB And C-terminal Kelch
85	PF07707	orang	BTB And C-terminal Kelch
16	PF07707	japonica	BTB And C-terminal Kelch
75	PF07707	gorilla	BTB And C-terminal Kelch
19	PF07707	elegans	BTB And C-terminal Kelch
95	PF07707	chimp	BTB And C-terminal Kelch
12	PF07707	briggsae	BTB And C-terminal Kelch
19	PF07707	brenneri	BTB And C-terminal Kelch
89	PF07707	bonobo	BTB And C-terminal Kelch
15	PF07707	angaria	BTB And C-terminal Kelch
41	PF07707	Dsimulans	BTB And C-terminal Kelch
60	PF07707	Dpseudo	BTB And C-terminal Kelch
45	PF07707	Dmelano	BTB And C-terminal Kelch
35	PF07707	Derecta	BTB And C-terminal Kelch
7	PF07683	orang	Cobalamin synthesis protein cobW C-terminal domain
27	PF07683	human	Cobalamin synthesis protein cobW C-terminal domain
2	PF07683	gorilla	Cobalamin synthesis protein cobW C-terminal domain
12	PF07683	chimp	Cobalamin synthesis protein cobW C-terminal domain
2	PF07177	remanei	Neuralized
9	PF07177	orang	Neuralized
14	PF07177	human	Neuralized
5	PF07177	gorilla	Neuralized
4	PF07177	elegans	Neuralized
8	PF07177	chimp	Neuralized
2	PF07177	briggsae	Neuralized
5	PF07177	bonobo	Neuralized
4	PF07177	Dsimulans	Neuralized
4	PF07177	Dpseudo	Neuralized
6	PF07177	Dmelano	Neuralized
4	PF07177	Derecta	Neuralized
22	PF07145	orang	Ataxin-2 C-terminal region
39	PF07145	human	Ataxin-2 C-terminal region
17	PF07145	gorilla	Ataxin-2 C-terminal region
9	PF07145	chimp	Ataxin-2 C-terminal region
10	PF07145	bonobo	Ataxin-2 C-terminal region
3	PF07145	angaria	Ataxin-2 C-terminal region
6	PF07145	Dsimulans	Ataxin-2 C-terminal region
6	PF07145	Dpseudo	Ataxin-2 C-terminal region
9	PF07145	Dmelano	Ataxin-2 C-terminal region
8	PF07145	Derecta	Ataxin-2 C-terminal region
2	PF07111	orang	Alpha helical coiled-coil rod protein (HCR)
15	PF07111	human	Alpha helical coiled-coil rod protein (HCR)
3	PF07111	gorilla	Alpha helical coiled-coil rod protein (HCR)
7	PF07111	bonobo	Alpha helical coiled-coil rod protein (HCR)
7	PF07054	Dpseudo	Pericardin like repeat
11	PF07004	orang	Sperm-tail PG-rich repeat
20	PF07004	human	Sperm-tail PG-rich repeat
8	PF07004	gorilla	Sperm-tail PG-rich repeat
10	PF07004	chimp	Sperm-tail PG-rich repeat
11	PF07004	bonobo	Sperm-tail PG-rich repeat
21	PF07004	Dsimulans	Sperm-tail PG-rich repeat
4	PF07004	Dpseudo	Sperm-tail PG-rich repeat
15	PF07004	Dmelano	Sperm-tail PG-rich repeat
10	PF07004	Derecta	Sperm-tail PG-rich repeat
34	PF06918	remanei	Protein of unknown function (DUF1280)
57	PF06918	japonica	Protein of unknown function (DUF1280)
7	PF06918	elegans	Protein of unknown function (DUF1280)
2	PF06918	briggsae	Protein of unknown function (DUF1280)
17	PF06918	brenneri	Protein of unknown function (DUF1280)
12	PF06918	angaria	Protein of unknown function (DUF1280)
8	PF06905	remanei	Fas apoptotic inhibitory molecule (FAIM1)	GO:negative regulation of apoptotic process ; GO:0043066
2	PF06905	orang	Fas apoptotic inhibitory molecule (FAIM1)	GO:negative regulation of apoptotic process ; GO:0043066
4	PF06905	human	Fas apoptotic inhibitory molecule (FAIM1)	GO:negative regulation of apoptotic process ; GO:0043066
3	PF06905	chimp	Fas apoptotic inhibitory molecule (FAIM1)	GO:negative regulation of apoptotic process ; GO:0043066
2	PF06905	briggsae	Fas apoptotic inhibitory molecule (FAIM1)	GO:negative regulation of apoptotic process ; GO:0043066
21	PF06905	brenneri	Fas apoptotic inhibitory molecule (FAIM1)	GO:negative regulation of apoptotic process ; GO:0043066
3	PF06905	bonobo	Fas apoptotic inhibitory molecule (FAIM1)	GO:negative regulation of apoptotic process ; GO:0043066
2	PF06905	Dsimulans	Fas apoptotic inhibitory molecule (FAIM1)	GO:negative regulation of apoptotic process ; GO:0043066
23	PF06758	orang	Repeat of unknown function (DUF1220)
62	PF06758	human	Repeat of unknown function (DUF1220)
14	PF06758	gorilla	Repeat of unknown function (DUF1220)
20	PF06758	chimp	Repeat of unknown function (DUF1220)
5	PF06758	bonobo	Repeat of unknown function (DUF1220)
13	PF06741	orang	LsmAD domain
24	PF06741	human	LsmAD domain
6	PF06741	gorilla	LsmAD domain
2	PF06741	chimp	LsmAD domain
2	PF06741	bonobo	LsmAD domain
2	PF06741	Dpseudo	LsmAD domain
3	PF06741	Dmelano	LsmAD domain
2	PF06741	Derecta	LsmAD domain
3	PF06740	Dpseudo	Protein of unknown function (DUF1213)	GO:microtubule cytoskeleton organization ; GO:0000226
3	PF06671	japonica	Repeat of unknown function (DUF1174)
3	PF06671	elegans	Repeat of unknown function (DUF1174)
3	PF06631	orang	Protein of unknown function (DUF1154)
13	PF06631	human	Protein of unknown function (DUF1154)
2	PF06631	gorilla	Protein of unknown function (DUF1154)
24	PF06631	elegans	Protein of unknown function (DUF1154)
6	PF06631	chimp	Protein of unknown function (DUF1154)
2	PF06631	brenneri	Protein of unknown function (DUF1154)
7	PF06631	bonobo	Protein of unknown function (DUF1154)
2	PF06631	Dsimulans	Protein of unknown function (DUF1154)
2	PF06631	Dpseudo	Protein of unknown function (DUF1154)
2	PF06631	Dmelano	Protein of unknown function (DUF1154)
10	PF06582	elegans	Repeat of unknown function (DUF1136)
5	PF06582	angaria	Repeat of unknown function (DUF1136)
17	PF06582	Dsimulans	Repeat of unknown function (DUF1136)
13	PF06582	Dmelano	Repeat of unknown function (DUF1136)
15	PF06582	Derecta	Repeat of unknown function (DUF1136)
70	PF06542	remanei	Regulator protein PHA-1
4	PF06542	japonica	Regulator protein PHA-1
15	PF06542	elegans	Regulator protein PHA-1
6	PF06542	briggsae	Regulator protein PHA-1
24	PF06542	brenneri	Regulator protein PHA-1
2	PF06542	angaria	Regulator protein PHA-1
14	PF06512	orang	Sodium ion transport-associated	GO:voltage-gated sodium channel activity ; GO:0005248 GO:sodium ion transport ; GO:0006814 GO:voltage-gated sodium channel complex ; GO:0001518
44	PF06512	human	Sodium ion transport-associated	GO:voltage-gated sodium channel activity ; GO:0005248 GO:sodium ion transport ; GO:0006814 GO:voltage-gated sodium channel complex ; GO:0001518
20	PF06512	gorilla	Sodium ion transport-associated	GO:voltage-gated sodium channel activity ; GO:0005248 GO:sodium ion transport ; GO:0006814 GO:voltage-gated sodium channel complex ; GO:0001518
24	PF06512	chimp	Sodium ion transport-associated	GO:voltage-gated sodium channel activity ; GO:0005248 GO:sodium ion transport ; GO:0006814 GO:voltage-gated sodium channel complex ; GO:0001518
20	PF06512	bonobo	Sodium ion transport-associated	GO:voltage-gated sodium channel activity ; GO:0005248 GO:sodium ion transport ; GO:0006814 GO:voltage-gated sodium channel complex ; GO:0001518
54	PF06512	Dmelano	Sodium ion transport-associated	GO:voltage-gated sodium channel activity ; GO:0005248 GO:sodium ion transport ; GO:0006814 GO:voltage-gated sodium channel complex ; GO:0001518
64	PF06512	Derecta	Sodium ion transport-associated	GO:voltage-gated sodium channel activity ; GO:0005248 GO:sodium ion transport ; GO:0006814 GO:voltage-gated sodium channel complex ; GO:0001518
3	PF06459	orang	Ryanodine Receptor TM 4-6	GO:ryanodine-sensitive calcium-release channel activity ; GO:0005219 GO:cellular calcium ion homeostasis ; GO:0006874 GO:integral component of membrane ; GO:0016021
18	PF06459	human	Ryanodine Receptor TM 4-6	GO:ryanodine-sensitive calcium-release channel activity ; GO:0005219 GO:cellular calcium ion homeostasis ; GO:0006874 GO:integral component of membrane ; GO:0016021
6	PF06459	gorilla	Ryanodine Receptor TM 4-6	GO:ryanodine-sensitive calcium-release channel activity ; GO:0005219 GO:cellular calcium ion homeostasis ; GO:0006874 GO:integral component of membrane ; GO:0016021
4	PF06459	elegans	Ryanodine Receptor TM 4-6	GO:ryanodine-sensitive calcium-release channel activity ; GO:0005219 GO:cellular calcium ion homeostasis ; GO:0006874 GO:integral component of membrane ; GO:0016021
18	PF06459	chimp	Ryanodine Receptor TM 4-6	GO:ryanodine-sensitive calcium-release channel activity ; GO:0005219 GO:cellular calcium ion homeostasis ; GO:0006874 GO:integral component of membrane ; GO:0016021
2	PF06459	brenneri	Ryanodine Receptor TM 4-6	GO:ryanodine-sensitive calcium-release channel activity ; GO:0005219 GO:cellular calcium ion homeostasis ; GO:0006874 GO:integral component of membrane ; GO:0016021
3	PF06459	bonobo	Ryanodine Receptor TM 4-6	GO:ryanodine-sensitive calcium-release channel activity ; GO:0005219 GO:cellular calcium ion homeostasis ; GO:0006874 GO:integral component of membrane ; GO:0016021
2	PF06459	angaria	Ryanodine Receptor TM 4-6	GO:ryanodine-sensitive calcium-release channel activity ; GO:0005219 GO:cellular calcium ion homeostasis ; GO:0006874 GO:integral component of membrane ; GO:0016021
16	PF06459	Dpseudo	Ryanodine Receptor TM 4-6	GO:ryanodine-sensitive calcium-release channel activity ; GO:0005219 GO:cellular calcium ion homeostasis ; GO:0006874 GO:integral component of membrane ; GO:0016021
10	PF06459	Dmelano	Ryanodine Receptor TM 4-6	GO:ryanodine-sensitive calcium-release channel activity ; GO:0005219 GO:cellular calcium ion homeostasis ; GO:0006874 GO:integral component of membrane ; GO:0016021
21	PF06459	Derecta	Ryanodine Receptor TM 4-6	GO:ryanodine-sensitive calcium-release channel activity ; GO:0005219 GO:cellular calcium ion homeostasis ; GO:0006874 GO:integral component of membrane ; GO:0016021
25	PF06409	orang	Nuclear pore complex interacting protein (NPIP)
90	PF06409	human	Nuclear pore complex interacting protein (NPIP)
7	PF06409	gorilla	Nuclear pore complex interacting protein (NPIP)
62	PF06409	chimp	Nuclear pore complex interacting protein (NPIP)
9	PF06311	orang	NUMB domain
10	PF06311	human	NUMB domain
3	PF06311	gorilla	NUMB domain
2	PF06311	chimp	NUMB domain
11	PF06311	bonobo	NUMB domain
2	PF06311	Dsimulans	NUMB domain
2	PF06311	Dpseudo	NUMB domain
2	PF06311	Dmelano	NUMB domain
2	PF06292	remanei	Domain of Unknown Function (DUF1041)
6	PF06292	orang	Domain of Unknown Function (DUF1041)
2	PF06292	japonica	Domain of Unknown Function (DUF1041)
71	PF06292	human	Domain of Unknown Function (DUF1041)
10	PF06292	gorilla	Domain of Unknown Function (DUF1041)
23	PF06292	elegans	Domain of Unknown Function (DUF1041)
50	PF06292	chimp	Domain of Unknown Function (DUF1041)
2	PF06292	briggsae	Domain of Unknown Function (DUF1041)
4	PF06292	brenneri	Domain of Unknown Function (DUF1041)
27	PF06292	bonobo	Domain of Unknown Function (DUF1041)
4	PF06292	angaria	Domain of Unknown Function (DUF1041)
10	PF06292	Dsimulans	Domain of Unknown Function (DUF1041)
11	PF06292	Dmelano	Domain of Unknown Function (DUF1041)
3	PF06292	Derecta	Domain of Unknown Function (DUF1041)
19	PF06229	orang	FRG1-like family
28	PF06229	human	FRG1-like family
3	PF06229	gorilla	FRG1-like family
7	PF06229	chimp	FRG1-like family
2	PF06229	brenneri	FRG1-like family
2	PF06229	angaria	FRG1-like family
58	PF05970	remanei	PIF1-like helicase	GO:DNA helicase activity ; GO:0003678 GO:telomere maintenance ; GO:0000723 GO:DNA repair ; GO:0006281
4	PF05970	orang	PIF1-like helicase	GO:DNA helicase activity ; GO:0003678 GO:telomere maintenance ; GO:0000723 GO:DNA repair ; GO:0006281
3	PF05970	human	PIF1-like helicase	GO:DNA helicase activity ; GO:0003678 GO:telomere maintenance ; GO:0000723 GO:DNA repair ; GO:0006281
2	PF05970	gorilla	PIF1-like helicase	GO:DNA helicase activity ; GO:0003678 GO:telomere maintenance ; GO:0000723 GO:DNA repair ; GO:0006281
11	PF05970	elegans	PIF1-like helicase	GO:DNA helicase activity ; GO:0003678 GO:telomere maintenance ; GO:0000723 GO:DNA repair ; GO:0006281
2	PF05970	chimp	PIF1-like helicase	GO:DNA helicase activity ; GO:0003678 GO:telomere maintenance ; GO:0000723 GO:DNA repair ; GO:0006281
7	PF05970	briggsae	PIF1-like helicase	GO:DNA helicase activity ; GO:0003678 GO:telomere maintenance ; GO:0000723 GO:DNA repair ; GO:0006281
36	PF05970	brenneri	PIF1-like helicase	GO:DNA helicase activity ; GO:0003678 GO:telomere maintenance ; GO:0000723 GO:DNA repair ; GO:0006281
6	PF05970	angaria	PIF1-like helicase	GO:DNA helicase activity ; GO:0003678 GO:telomere maintenance ; GO:0000723 GO:DNA repair ; GO:0006281
18	PF05902	orang	4.1 protein C-terminal domain (CTD)	GO:actin binding ; GO:0003779 GO:structural molecule activity ; GO:0005198 GO:cytoskeleton ; GO:0005856
94	PF05902	human	4.1 protein C-terminal domain (CTD)	GO:actin binding ; GO:0003779 GO:structural molecule activity ; GO:0005198 GO:cytoskeleton ; GO:0005856
7	PF05902	gorilla	4.1 protein C-terminal domain (CTD)	GO:actin binding ; GO:0003779 GO:structural molecule activity ; GO:0005198 GO:cytoskeleton ; GO:0005856
4	PF05902	elegans	4.1 protein C-terminal domain (CTD)	GO:actin binding ; GO:0003779 GO:structural molecule activity ; GO:0005198 GO:cytoskeleton ; GO:0005856
75	PF05902	chimp	4.1 protein C-terminal domain (CTD)	GO:actin binding ; GO:0003779 GO:structural molecule activity ; GO:0005198 GO:cytoskeleton ; GO:0005856
2	PF05902	brenneri	4.1 protein C-terminal domain (CTD)	GO:actin binding ; GO:0003779 GO:structural molecule activity ; GO:0005198 GO:cytoskeleton ; GO:0005856
59	PF05902	bonobo	4.1 protein C-terminal domain (CTD)	GO:actin binding ; GO:0003779 GO:structural molecule activity ; GO:0005198 GO:cytoskeleton ; GO:0005856
8	PF05902	Dsimulans	4.1 protein C-terminal domain (CTD)	GO:actin binding ; GO:0003779 GO:structural molecule activity ; GO:0005198 GO:cytoskeleton ; GO:0005856
2	PF05902	Dpseudo	4.1 protein C-terminal domain (CTD)	GO:actin binding ; GO:0003779 GO:structural molecule activity ; GO:0005198 GO:cytoskeleton ; GO:0005856
6	PF05902	Dmelano	4.1 protein C-terminal domain (CTD)	GO:actin binding ; GO:0003779 GO:structural molecule activity ; GO:0005198 GO:cytoskeleton ; GO:0005856
4	PF05902	Derecta	4.1 protein C-terminal domain (CTD)	GO:actin binding ; GO:0003779 GO:structural molecule activity ; GO:0005198 GO:cytoskeleton ; GO:0005856
3	PF05742	remanei	NRDE protein
5	PF05742	orang	NRDE protein
4	PF05742	japonica	NRDE protein
16	PF05742	human	NRDE protein
2	PF05742	gorilla	NRDE protein
2	PF05742	elegans	NRDE protein
2	PF05742	briggsae	NRDE protein
2	PF05742	brenneri	NRDE protein
6	PF05742	bonobo	NRDE protein
4	PF05742	Dsimulans	NRDE protein
2	PF05742	Dpseudo	NRDE protein
2	PF05742	Dmelano	NRDE protein
2	PF05742	Derecta	NRDE protein
2	PF05647	orang	Tandem-repeating region of mucin
3	PF05647	human	Tandem-repeating region of mucin
10	PF05644	orang	Mitochondrial and peroxisomal fission factor Mff
19	PF05644	human	Mitochondrial and peroxisomal fission factor Mff
2	PF05644	gorilla	Mitochondrial and peroxisomal fission factor Mff
16	PF05644	chimp	Mitochondrial and peroxisomal fission factor Mff
18	PF05644	bonobo	Mitochondrial and peroxisomal fission factor Mff
2	PF05644	Dsimulans	Mitochondrial and peroxisomal fission factor Mff
2	PF05644	Dmelano	Mitochondrial and peroxisomal fission factor Mff
8	PF05611	remanei	Caenorhabditis elegans protein of unknown function (DUF780)
21	PF05611	japonica	Caenorhabditis elegans protein of unknown function (DUF780)
8	PF05611	elegans	Caenorhabditis elegans protein of unknown function (DUF780)
4	PF05611	briggsae	Caenorhabditis elegans protein of unknown function (DUF780)
5	PF05611	brenneri	Caenorhabditis elegans protein of unknown function (DUF780)
6	PF05611	angaria	Caenorhabditis elegans protein of unknown function (DUF780)
7	PF05461	orang	Apolipoprotein L	GO:lipid binding ; GO:0008289 GO:lipid transport ; GO:0006869 GO:lipoprotein metabolic process ; GO:0042157 GO:extracellular region ; GO:0005576
18	PF05461	human	Apolipoprotein L	GO:lipid binding ; GO:0008289 GO:lipid transport ; GO:0006869 GO:lipoprotein metabolic process ; GO:0042157 GO:extracellular region ; GO:0005576
11	PF05461	gorilla	Apolipoprotein L	GO:lipid binding ; GO:0008289 GO:lipid transport ; GO:0006869 GO:lipoprotein metabolic process ; GO:0042157 GO:extracellular region ; GO:0005576
2	PF05461	elegans	Apolipoprotein L	GO:lipid binding ; GO:0008289 GO:lipid transport ; GO:0006869 GO:lipoprotein metabolic process ; GO:0042157 GO:extracellular region ; GO:0005576
8	PF05461	chimp	Apolipoprotein L	GO:lipid binding ; GO:0008289 GO:lipid transport ; GO:0006869 GO:lipoprotein metabolic process ; GO:0042157 GO:extracellular region ; GO:0005576
2	PF05461	brenneri	Apolipoprotein L	GO:lipid binding ; GO:0008289 GO:lipid transport ; GO:0006869 GO:lipoprotein metabolic process ; GO:0042157 GO:extracellular region ; GO:0005576
7	PF05461	bonobo	Apolipoprotein L	GO:lipid binding ; GO:0008289 GO:lipid transport ; GO:0006869 GO:lipoprotein metabolic process ; GO:0042157 GO:extracellular region ; GO:0005576
2	PF05461	angaria	Apolipoprotein L	GO:lipid binding ; GO:0008289 GO:lipid transport ; GO:0006869 GO:lipoprotein metabolic process ; GO:0042157 GO:extracellular region ; GO:0005576
71	PF05380	remanei	Pao retrotransposon peptidase
62	PF05380	japonica	Pao retrotransposon peptidase
4	PF05380	briggsae	Pao retrotransposon peptidase
37	PF05380	brenneri	Pao retrotransposon peptidase
7	PF05380	angaria	Pao retrotransposon peptidase
3	PF05301	remanei	Touch receptor neuron protein Mec-17	GO:tubulin N-acetyltransferase activity ; GO:0019799 GO:alpha-tubulin acetylation ; GO:0071929 GO:microtubule ; GO:0005874
2	PF05301	japonica	Touch receptor neuron protein Mec-17	GO:tubulin N-acetyltransferase activity ; GO:0019799 GO:alpha-tubulin acetylation ; GO:0071929 GO:microtubule ; GO:0005874
10	PF05301	human	Touch receptor neuron protein Mec-17	GO:tubulin N-acetyltransferase activity ; GO:0019799 GO:alpha-tubulin acetylation ; GO:0071929 GO:microtubule ; GO:0005874
4	PF05301	gorilla	Touch receptor neuron protein Mec-17	GO:tubulin N-acetyltransferase activity ; GO:0019799 GO:alpha-tubulin acetylation ; GO:0071929 GO:microtubule ; GO:0005874
3	PF05301	elegans	Touch receptor neuron protein Mec-17	GO:tubulin N-acetyltransferase activity ; GO:0019799 GO:alpha-tubulin acetylation ; GO:0071929 GO:microtubule ; GO:0005874
7	PF05301	chimp	Touch receptor neuron protein Mec-17	GO:tubulin N-acetyltransferase activity ; GO:0019799 GO:alpha-tubulin acetylation ; GO:0071929 GO:microtubule ; GO:0005874
2	PF05301	briggsae	Touch receptor neuron protein Mec-17	GO:tubulin N-acetyltransferase activity ; GO:0019799 GO:alpha-tubulin acetylation ; GO:0071929 GO:microtubule ; GO:0005874
2	PF05301	brenneri	Touch receptor neuron protein Mec-17	GO:tubulin N-acetyltransferase activity ; GO:0019799 GO:alpha-tubulin acetylation ; GO:0071929 GO:microtubule ; GO:0005874
5	PF05301	bonobo	Touch receptor neuron protein Mec-17	GO:tubulin N-acetyltransferase activity ; GO:0019799 GO:alpha-tubulin acetylation ; GO:0071929 GO:microtubule ; GO:0005874
2	PF05301	angaria	Touch receptor neuron protein Mec-17	GO:tubulin N-acetyltransferase activity ; GO:0019799 GO:alpha-tubulin acetylation ; GO:0071929 GO:microtubule ; GO:0005874
3	PF05301	Dsimulans	Touch receptor neuron protein Mec-17	GO:tubulin N-acetyltransferase activity ; GO:0019799 GO:alpha-tubulin acetylation ; GO:0071929 GO:microtubule ; GO:0005874
3	PF05301	Dpseudo	Touch receptor neuron protein Mec-17	GO:tubulin N-acetyltransferase activity ; GO:0019799 GO:alpha-tubulin acetylation ; GO:0071929 GO:microtubule ; GO:0005874
3	PF05301	Dmelano	Touch receptor neuron protein Mec-17	GO:tubulin N-acetyltransferase activity ; GO:0019799 GO:alpha-tubulin acetylation ; GO:0071929 GO:microtubule ; GO:0005874
3	PF05301	Derecta	Touch receptor neuron protein Mec-17	GO:tubulin N-acetyltransferase activity ; GO:0019799 GO:alpha-tubulin acetylation ; GO:0071929 GO:microtubule ; GO:0005874
7	PF05083	orang	LST-1 protein	GO:cell morphogenesis ; GO:0000902 GO:immune response ; GO:0006955 GO:membrane ; GO:0016020
6	PF05083	human	LST-1 protein	GO:cell morphogenesis ; GO:0000902 GO:immune response ; GO:0006955 GO:membrane ; GO:0016020
4	PF05083	gorilla	LST-1 protein	GO:cell morphogenesis ; GO:0000902 GO:immune response ; GO:0006955 GO:membrane ; GO:0016020
5	PF05083	chimp	LST-1 protein	GO:cell morphogenesis ; GO:0000902 GO:immune response ; GO:0006955 GO:membrane ; GO:0016020
3	PF05083	bonobo	LST-1 protein	GO:cell morphogenesis ; GO:0000902 GO:immune response ; GO:0006955 GO:membrane ; GO:0016020
28	PF05075	remanei	Protein of unknown function (DUF684)
9	PF05075	japonica	Protein of unknown function (DUF684)
12	PF05075	elegans	Protein of unknown function (DUF684)
12	PF05075	briggsae	Protein of unknown function (DUF684)
59	PF05075	brenneri	Protein of unknown function (DUF684)
15	PF05033	remanei	Pre-SET motif	GO:zinc ion binding ; GO:0008270 GO:histone-lysine N-methyltransferase activity ; GO:0018024 GO:histone lysine methylation ; GO:0034968 GO:nucleus ; GO:0005634
11	PF05033	orang	Pre-SET motif	GO:zinc ion binding ; GO:0008270 GO:histone-lysine N-methyltransferase activity ; GO:0018024 GO:histone lysine methylation ; GO:0034968 GO:nucleus ; GO:0005634
4	PF05033	japonica	Pre-SET motif	GO:zinc ion binding ; GO:0008270 GO:histone-lysine N-methyltransferase activity ; GO:0018024 GO:histone lysine methylation ; GO:0034968 GO:nucleus ; GO:0005634
45	PF05033	human	Pre-SET motif	GO:zinc ion binding ; GO:0008270 GO:histone-lysine N-methyltransferase activity ; GO:0018024 GO:histone lysine methylation ; GO:0034968 GO:nucleus ; GO:0005634
9	PF05033	gorilla	Pre-SET motif	GO:zinc ion binding ; GO:0008270 GO:histone-lysine N-methyltransferase activity ; GO:0018024 GO:histone lysine methylation ; GO:0034968 GO:nucleus ; GO:0005634
4	PF05033	elegans	Pre-SET motif	GO:zinc ion binding ; GO:0008270 GO:histone-lysine N-methyltransferase activity ; GO:0018024 GO:histone lysine methylation ; GO:0034968 GO:nucleus ; GO:0005634
14	PF05033	chimp	Pre-SET motif	GO:zinc ion binding ; GO:0008270 GO:histone-lysine N-methyltransferase activity ; GO:0018024 GO:histone lysine methylation ; GO:0034968 GO:nucleus ; GO:0005634
6	PF05033	briggsae	Pre-SET motif	GO:zinc ion binding ; GO:0008270 GO:histone-lysine N-methyltransferase activity ; GO:0018024 GO:histone lysine methylation ; GO:0034968 GO:nucleus ; GO:0005634
22	PF05033	brenneri	Pre-SET motif	GO:zinc ion binding ; GO:0008270 GO:histone-lysine N-methyltransferase activity ; GO:0018024 GO:histone lysine methylation ; GO:0034968 GO:nucleus ; GO:0005634
20	PF05033	bonobo	Pre-SET motif	GO:zinc ion binding ; GO:0008270 GO:histone-lysine N-methyltransferase activity ; GO:0018024 GO:histone lysine methylation ; GO:0034968 GO:nucleus ; GO:0005634
4	PF05033	angaria	Pre-SET motif	GO:zinc ion binding ; GO:0008270 GO:histone-lysine N-methyltransferase activity ; GO:0018024 GO:histone lysine methylation ; GO:0034968 GO:nucleus ; GO:0005634
4	PF05033	Dsimulans	Pre-SET motif	GO:zinc ion binding ; GO:0008270 GO:histone-lysine N-methyltransferase activity ; GO:0018024 GO:histone lysine methylation ; GO:0034968 GO:nucleus ; GO:0005634
2	PF05033	Dpseudo	Pre-SET motif	GO:zinc ion binding ; GO:0008270 GO:histone-lysine N-methyltransferase activity ; GO:0018024 GO:histone lysine methylation ; GO:0034968 GO:nucleus ; GO:0005634
3	PF05033	Dmelano	Pre-SET motif	GO:zinc ion binding ; GO:0008270 GO:histone-lysine N-methyltransferase activity ; GO:0018024 GO:histone lysine methylation ; GO:0034968 GO:nucleus ; GO:0005634
3	PF05033	Derecta	Pre-SET motif	GO:zinc ion binding ; GO:0008270 GO:histone-lysine N-methyltransferase activity ; GO:0018024 GO:histone lysine methylation ; GO:0034968 GO:nucleus ; GO:0005634
2	PF05001	orang	RNA polymerase Rpb1 C-terminal repeat	GO:DNA binding ; GO:0003677 GO:transcription from RNA polymerase II promoter ; GO:0006366 GO:DNA-directed RNA polymerase II
2	PF05001	japonica	RNA polymerase Rpb1 C-terminal repeat	GO:DNA binding ; GO:0003677 GO:transcription from RNA polymerase II promoter ; GO:0006366 GO:DNA-directed RNA polymerase II
2	PF05001	human	RNA polymerase Rpb1 C-terminal repeat	GO:DNA binding ; GO:0003677 GO:transcription from RNA polymerase II promoter ; GO:0006366 GO:DNA-directed RNA polymerase II
3	PF05001	gorilla	RNA polymerase Rpb1 C-terminal repeat	GO:DNA binding ; GO:0003677 GO:transcription from RNA polymerase II promoter ; GO:0006366 GO:DNA-directed RNA polymerase II
2	PF05001	chimp	RNA polymerase Rpb1 C-terminal repeat	GO:DNA binding ; GO:0003677 GO:transcription from RNA polymerase II promoter ; GO:0006366 GO:DNA-directed RNA polymerase II
2	PF05001	bonobo	RNA polymerase Rpb1 C-terminal repeat	GO:DNA binding ; GO:0003677 GO:transcription from RNA polymerase II promoter ; GO:0006366 GO:DNA-directed RNA polymerase II
15	PF04942	remanei	CC domain
6	PF04942	japonica	CC domain
16	PF04942	elegans	CC domain
15	PF04942	briggsae	CC domain
11	PF04942	brenneri	CC domain
3	PF04942	angaria	CC domain
10	PF04880	orang	NUDE protein
14	PF04880	human	NUDE protein
3	PF04880	gorilla	NUDE protein
2	PF04880	chimp	NUDE protein
9	PF04880	bonobo	NUDE protein
3	PF04880	Dsimulans	NUDE protein
4	PF04880	Dmelano	NUDE protein
2	PF04880	Derecta	NUDE protein
3	PF04826	remanei	Armadillo-like
18	PF04826	orang	Armadillo-like
25	PF04826	human	Armadillo-like
17	PF04826	gorilla	Armadillo-like
16	PF04826	chimp	Armadillo-like
8	PF04826	brenneri	Armadillo-like
13	PF04826	bonobo	Armadillo-like
2	PF04826	angaria	Armadillo-like
2	PF04747	japonica	Protein of unknown function
11	PF04747	elegans	Protein of unknown function
2	PF04747	angaria	Protein of unknown function
8	PF04629	human	Islet cell autoantigen ICA69
2	PF04629	gorilla	Islet cell autoantigen ICA69
7	PF04629	chimp	Islet cell autoantigen ICA69
3	PF04629	bonobo	Islet cell autoantigen ICA69
2	PF04624	Dsimulans	Dec-1 repeat	GO:structural constituent of chorion ; GO:0005213 GO:chorion-containing eggshell formation ; GO:0007304 GO:extracellular region ; GO:0005576 GO:chorion ; GO:0042600
6	PF04624	Dmelano	Dec-1 repeat	GO:structural constituent of chorion ; GO:0005213 GO:chorion-containing eggshell formation ; GO:0007304 GO:extracellular region ; GO:0005576 GO:chorion ; GO:0042600
4	PF04624	Derecta	Dec-1 repeat	GO:structural constituent of chorion ; GO:0005213 GO:chorion-containing eggshell formation ; GO:0007304 GO:extracellular region ; GO:0005576 GO:chorion ; GO:0042600
10	PF04516	orang	CP2 transcription factor
24	PF04516	human	CP2 transcription factor
9	PF04516	gorilla	CP2 transcription factor
2	PF04516	elegans	CP2 transcription factor
10	PF04516	chimp	CP2 transcription factor
13	PF04516	bonobo	CP2 transcription factor
2	PF04516	angaria	CP2 transcription factor
4	PF04516	Dsimulans	CP2 transcription factor
18	PF04516	Dpseudo	CP2 transcription factor
9	PF04516	Dmelano	CP2 transcription factor
11	PF04516	Derecta	CP2 transcription factor
5	PF04500	remanei	FLYWCH zinc finger domain
3	PF04500	orang	FLYWCH zinc finger domain
4	PF04500	japonica	FLYWCH zinc finger domain
11	PF04500	human	FLYWCH zinc finger domain
6	PF04500	elegans	FLYWCH zinc finger domain
4	PF04500	briggsae	FLYWCH zinc finger domain
6	PF04500	brenneri	FLYWCH zinc finger domain
3	PF04500	bonobo	FLYWCH zinc finger domain
3	PF04500	angaria	FLYWCH zinc finger domain
27	PF04500	Dsimulans	FLYWCH zinc finger domain
29	PF04500	Dpseudo	FLYWCH zinc finger domain
51	PF04500	Dmelano	FLYWCH zinc finger domain
33	PF04500	Derecta	FLYWCH zinc finger domain
5	PF04499	orang	SIT4 phosphatase-associated protein
46	PF04499	human	SIT4 phosphatase-associated protein
9	PF04499	gorilla	SIT4 phosphatase-associated protein
3	PF04499	elegans	SIT4 phosphatase-associated protein
20	PF04499	chimp	SIT4 phosphatase-associated protein
25	PF04499	bonobo	SIT4 phosphatase-associated protein
2	PF04499	Dsimulans	SIT4 phosphatase-associated protein
3	PF04499	Dmelano	SIT4 phosphatase-associated protein
5	PF04493	orang	Endonuclease V	GO:endonuclease activity ; GO:0004519 GO:DNA repair ; GO:0006281
2	PF04493	japonica	Endonuclease V	GO:endonuclease activity ; GO:0004519 GO:DNA repair ; GO:0006281
21	PF04493	human	Endonuclease V	GO:endonuclease activity ; GO:0004519 GO:DNA repair ; GO:0006281
2	PF04493	gorilla	Endonuclease V	GO:endonuclease activity ; GO:0004519 GO:DNA repair ; GO:0006281
4	PF04493	bonobo	Endonuclease V	GO:endonuclease activity ; GO:0004519 GO:DNA repair ; GO:0006281
2	PF04493	angaria	Endonuclease V	GO:endonuclease activity ; GO:0004519 GO:DNA repair ; GO:0006281
86	PF04435	remanei	Domain of unknown function (DUF545)
22	PF04435	japonica	Domain of unknown function (DUF545)
44	PF04435	elegans	Domain of unknown function (DUF545)
27	PF04435	briggsae	Domain of unknown function (DUF545)
15	PF04382	orang	SAB domain	GO:cytoskeletal protein binding ; GO:0008092 GO:cortical actin cytoskeleton organization ; GO:0030866 GO:cytoskeleton ; GO:0005856
98	PF04382	human	SAB domain	GO:cytoskeletal protein binding ; GO:0008092 GO:cortical actin cytoskeleton organization ; GO:0030866 GO:cytoskeleton ; GO:0005856
6	PF04382	gorilla	SAB domain	GO:cytoskeletal protein binding ; GO:0008092 GO:cortical actin cytoskeleton organization ; GO:0030866 GO:cytoskeleton ; GO:0005856
76	PF04382	chimp	SAB domain	GO:cytoskeletal protein binding ; GO:0008092 GO:cortical actin cytoskeleton organization ; GO:0030866 GO:cytoskeleton ; GO:0005856
53	PF04382	bonobo	SAB domain	GO:cytoskeletal protein binding ; GO:0008092 GO:cortical actin cytoskeleton organization ; GO:0030866 GO:cytoskeleton ; GO:0005856
13	PF04265	human	Thiamin pyrophosphokinase	GO:thiamine binding ; GO:0030975 GO:thiamine diphosphate biosynthetic process ; GO:0009229
2	PF04265	gorilla	Thiamin pyrophosphokinase	GO:thiamine binding ; GO:0030975 GO:thiamine diphosphate biosynthetic process ; GO:0009229
2	PF04265	elegans	Thiamin pyrophosphokinase	GO:thiamine binding ; GO:0030975 GO:thiamine diphosphate biosynthetic process ; GO:0009229
2	PF04265	chimp	Thiamin pyrophosphokinase	GO:thiamine binding ; GO:0030975 GO:thiamine diphosphate biosynthetic process ; GO:0009229
2	PF04265	Dmelano	Thiamin pyrophosphokinase	GO:thiamine binding ; GO:0030975 GO:thiamine diphosphate biosynthetic process ; GO:0009229
4	PF04153	remanei	NOT2 / NOT3 / NOT5 family	GO:regulation of transcription
4	PF04153	japonica	NOT2 / NOT3 / NOT5 family	GO:regulation of transcription
11	PF04153	human	NOT2 / NOT3 / NOT5 family	GO:regulation of transcription
3	PF04153	gorilla	NOT2 / NOT3 / NOT5 family	GO:regulation of transcription
8	PF04153	elegans	NOT2 / NOT3 / NOT5 family	GO:regulation of transcription
7	PF04153	chimp	NOT2 / NOT3 / NOT5 family	GO:regulation of transcription
3	PF04153	briggsae	NOT2 / NOT3 / NOT5 family	GO:regulation of transcription
5	PF04153	brenneri	NOT2 / NOT3 / NOT5 family	GO:regulation of transcription
7	PF04153	bonobo	NOT2 / NOT3 / NOT5 family	GO:regulation of transcription
4	PF04153	angaria	NOT2 / NOT3 / NOT5 family	GO:regulation of transcription
8	PF04153	Dsimulans	NOT2 / NOT3 / NOT5 family	GO:regulation of transcription
5	PF04153	Dpseudo	NOT2 / NOT3 / NOT5 family	GO:regulation of transcription
4	PF04153	Dmelano	NOT2 / NOT3 / NOT5 family	GO:regulation of transcription
4	PF04153	Derecta	NOT2 / NOT3 / NOT5 family	GO:regulation of transcription
2	PF04129	japonica	Vps52 / Sac2 family
4	PF04129	human	Vps52 / Sac2 family
2	PF04129	chimp	Vps52 / Sac2 family
2	PF04129	angaria	Vps52 / Sac2 family
11	PF04122	angaria	Putative cell wall binding repeat 2
6	PF04065	human	Not1 N-terminal domain	GO:regulation of transcription
2	PF04065	gorilla	Not1 N-terminal domain	GO:regulation of transcription
6	PF04065	chimp	Not1 N-terminal domain	GO:regulation of transcription
5	PF04065	bonobo	Not1 N-terminal domain	GO:regulation of transcription
2	PF04065	angaria	Not1 N-terminal domain	GO:regulation of transcription
3	PF04065	Dsimulans	Not1 N-terminal domain	GO:regulation of transcription
33	PF03931	remanei	Skp1 family	GO:ubiquitin-dependent protein catabolic process ; GO:0006511
6	PF03931	orang	Skp1 family	GO:ubiquitin-dependent protein catabolic process ; GO:0006511
3	PF03931	japonica	Skp1 family	GO:ubiquitin-dependent protein catabolic process ; GO:0006511
4	PF03931	human	Skp1 family	GO:ubiquitin-dependent protein catabolic process ; GO:0006511
8	PF03931	gorilla	Skp1 family	GO:ubiquitin-dependent protein catabolic process ; GO:0006511
22	PF03931	elegans	Skp1 family	GO:ubiquitin-dependent protein catabolic process ; GO:0006511
5	PF03931	chimp	Skp1 family	GO:ubiquitin-dependent protein catabolic process ; GO:0006511
18	PF03931	briggsae	Skp1 family	GO:ubiquitin-dependent protein catabolic process ; GO:0006511
53	PF03931	brenneri	Skp1 family	GO:ubiquitin-dependent protein catabolic process ; GO:0006511
6	PF03931	bonobo	Skp1 family	GO:ubiquitin-dependent protein catabolic process ; GO:0006511
2	PF03931	angaria	Skp1 family	GO:ubiquitin-dependent protein catabolic process ; GO:0006511
6	PF03931	Dsimulans	Skp1 family	GO:ubiquitin-dependent protein catabolic process ; GO:0006511
18	PF03931	Dpseudo	Skp1 family	GO:ubiquitin-dependent protein catabolic process ; GO:0006511
9	PF03931	Dmelano	Skp1 family	GO:ubiquitin-dependent protein catabolic process ; GO:0006511
6	PF03931	Derecta	Skp1 family	GO:ubiquitin-dependent protein catabolic process ; GO:0006511
2	PF03915	remanei	Actin interacting protein 3
6	PF03915	orang	Actin interacting protein 3
4	PF03915	japonica	Actin interacting protein 3
30	PF03915	human	Actin interacting protein 3
7	PF03915	gorilla	Actin interacting protein 3
3	PF03915	elegans	Actin interacting protein 3
23	PF03915	chimp	Actin interacting protein 3
3	PF03915	brenneri	Actin interacting protein 3
11	PF03915	bonobo	Actin interacting protein 3
2	PF03915	angaria	Actin interacting protein 3
8	PF03915	Dsimulans	Actin interacting protein 3
11	PF03915	Dmelano	Actin interacting protein 3
7	PF03915	Derecta	Actin interacting protein 3
21	PF03859	human	CG-1 domain	GO:DNA binding ; GO:0003677 GO:nucleus ; GO:0005634
4	PF03859	gorilla	CG-1 domain	GO:DNA binding ; GO:0003677 GO:nucleus ; GO:0005634
2	PF03859	elegans	CG-1 domain	GO:DNA binding ; GO:0003677 GO:nucleus ; GO:0005634
2	PF03859	chimp	CG-1 domain	GO:DNA binding ; GO:0003677 GO:nucleus ; GO:0005634
9	PF03859	bonobo	CG-1 domain	GO:DNA binding ; GO:0003677 GO:nucleus ; GO:0005634
6	PF03859	Dpseudo	CG-1 domain	GO:DNA binding ; GO:0003677 GO:nucleus ; GO:0005634
7	PF03859	Dmelano	CG-1 domain	GO:DNA binding ; GO:0003677 GO:nucleus ; GO:0005634
3	PF03859	Derecta	CG-1 domain	GO:DNA binding ; GO:0003677 GO:nucleus ; GO:0005634
4	PF03762	orang	Vitelline membrane outer layer protein I (VOMI)
4	PF03762	human	Vitelline membrane outer layer protein I (VOMI)
4	PF03762	gorilla	Vitelline membrane outer layer protein I (VOMI)
21	PF03762	elegans	Vitelline membrane outer layer protein I (VOMI)
3	PF03762	chimp	Vitelline membrane outer layer protein I (VOMI)
3	PF03762	briggsae	Vitelline membrane outer layer protein I (VOMI)
4	PF03762	bonobo	Vitelline membrane outer layer protein I (VOMI)
40	PF03761	remanei	Domain of unknown function (DUF316)
24	PF03761	japonica	Domain of unknown function (DUF316)
19	PF03761	elegans	Domain of unknown function (DUF316)
31	PF03761	briggsae	Domain of unknown function (DUF316)
36	PF03761	brenneri	Domain of unknown function (DUF316)
32	PF03732	remanei	Retrotransposon gag protein
93	PF03732	japonica	Retrotransposon gag protein
15	PF03732	brenneri	Retrotransposon gag protein
2	PF03732	Dpseudo	Retrotransposon gag protein
2	PF03719	remanei	Ribosomal protein S5	GO:structural constituent of ribosome ; GO:0003735 GO:translation ; GO:0006412 GO:ribosome ; GO:0005840
4	PF03719	orang	Ribosomal protein S5	GO:structural constituent of ribosome ; GO:0003735 GO:translation ; GO:0006412 GO:ribosome ; GO:0005840
3	PF03719	human	Ribosomal protein S5	GO:structural constituent of ribosome ; GO:0003735 GO:translation ; GO:0006412 GO:ribosome ; GO:0005840
14	PF03719	gorilla	Ribosomal protein S5	GO:structural constituent of ribosome ; GO:0003735 GO:translation ; GO:0006412 GO:ribosome ; GO:0005840
2	PF03719	elegans	Ribosomal protein S5	GO:structural constituent of ribosome ; GO:0003735 GO:translation ; GO:0006412 GO:ribosome ; GO:0005840
3	PF03719	chimp	Ribosomal protein S5	GO:structural constituent of ribosome ; GO:0003735 GO:translation ; GO:0006412 GO:ribosome ; GO:0005840
2	PF03719	briggsae	Ribosomal protein S5	GO:structural constituent of ribosome ; GO:0003735 GO:translation ; GO:0006412 GO:ribosome ; GO:0005840
2	PF03719	brenneri	Ribosomal protein S5	GO:structural constituent of ribosome ; GO:0003735 GO:translation ; GO:0006412 GO:ribosome ; GO:0005840
3	PF03719	bonobo	Ribosomal protein S5	GO:structural constituent of ribosome ; GO:0003735 GO:translation ; GO:0006412 GO:ribosome ; GO:0005840
4	PF03719	angaria	Ribosomal protein S5	GO:structural constituent of ribosome ; GO:0003735 GO:translation ; GO:0006412 GO:ribosome ; GO:0005840
2	PF03719	Dsimulans	Ribosomal protein S5	GO:structural constituent of ribosome ; GO:0003735 GO:translation ; GO:0006412 GO:ribosome ; GO:0005840
4	PF03719	Dpseudo	Ribosomal protein S5	GO:structural constituent of ribosome ; GO:0003735 GO:translation ; GO:0006412 GO:ribosome ; GO:0005840
2	PF03719	Dmelano	Ribosomal protein S5	GO:structural constituent of ribosome ; GO:0003735 GO:translation ; GO:0006412 GO:ribosome ; GO:0005840
2	PF03719	Derecta	Ribosomal protein S5	GO:structural constituent of ribosome ; GO:0003735 GO:translation ; GO:0006412 GO:ribosome ; GO:0005840
2	PF03623	orang	Focal adhesion targeting region	GO:protein tyrosine kinase activity ; GO:0004713 GO:signal transducer activity ; GO:0004871 GO:protein phosphorylation ; GO:0006468 GO:signal complex assembly ; GO:0007172 GO:focal adhesion ; GO:0005925
2	PF03623	japonica	Focal adhesion targeting region	GO:protein tyrosine kinase activity ; GO:0004713 GO:signal transducer activity ; GO:0004871 GO:protein phosphorylation ; GO:0006468 GO:signal complex assembly ; GO:0007172 GO:focal adhesion ; GO:0005925
25	PF03623	human	Focal adhesion targeting region	GO:protein tyrosine kinase activity ; GO:0004713 GO:signal transducer activity ; GO:0004871 GO:protein phosphorylation ; GO:0006468 GO:signal complex assembly ; GO:0007172 GO:focal adhesion ; GO:0005925
2	PF03623	gorilla	Focal adhesion targeting region	GO:protein tyrosine kinase activity ; GO:0004713 GO:signal transducer activity ; GO:0004871 GO:protein phosphorylation ; GO:0006468 GO:signal complex assembly ; GO:0007172 GO:focal adhesion ; GO:0005925
2	PF03623	elegans	Focal adhesion targeting region	GO:protein tyrosine kinase activity ; GO:0004713 GO:signal transducer activity ; GO:0004871 GO:protein phosphorylation ; GO:0006468 GO:signal complex assembly ; GO:0007172 GO:focal adhesion ; GO:0005925
18	PF03623	chimp	Focal adhesion targeting region	GO:protein tyrosine kinase activity ; GO:0004713 GO:signal transducer activity ; GO:0004871 GO:protein phosphorylation ; GO:0006468 GO:signal complex assembly ; GO:0007172 GO:focal adhesion ; GO:0005925
2	PF03623	brenneri	Focal adhesion targeting region	GO:protein tyrosine kinase activity ; GO:0004713 GO:signal transducer activity ; GO:0004871 GO:protein phosphorylation ; GO:0006468 GO:signal complex assembly ; GO:0007172 GO:focal adhesion ; GO:0005925
10	PF03623	bonobo	Focal adhesion targeting region	GO:protein tyrosine kinase activity ; GO:0004713 GO:signal transducer activity ; GO:0004871 GO:protein phosphorylation ; GO:0006468 GO:signal complex assembly ; GO:0007172 GO:focal adhesion ; GO:0005925
2	PF03623	Dsimulans	Focal adhesion targeting region	GO:protein tyrosine kinase activity ; GO:0004713 GO:signal transducer activity ; GO:0004871 GO:protein phosphorylation ; GO:0006468 GO:signal complex assembly ; GO:0007172 GO:focal adhesion ; GO:0005925
2	PF03623	Dpseudo	Focal adhesion targeting region	GO:protein tyrosine kinase activity ; GO:0004713 GO:signal transducer activity ; GO:0004871 GO:protein phosphorylation ; GO:0006468 GO:signal complex assembly ; GO:0007172 GO:focal adhesion ; GO:0005925
3	PF03623	Dmelano	Focal adhesion targeting region	GO:protein tyrosine kinase activity ; GO:0004713 GO:signal transducer activity ; GO:0004871 GO:protein phosphorylation ; GO:0006468 GO:signal complex assembly ; GO:0007172 GO:focal adhesion ; GO:0005925
2	PF03623	Derecta	Focal adhesion targeting region	GO:protein tyrosine kinase activity ; GO:0004713 GO:signal transducer activity ; GO:0004871 GO:protein phosphorylation ; GO:0006468 GO:signal complex assembly ; GO:0007172 GO:focal adhesion ; GO:0005925
84	PF03564	remanei	Protein of unknown function (DUF1759)
45	PF03564	japonica	Protein of unknown function (DUF1759)
8	PF03564	briggsae	Protein of unknown function (DUF1759)
40	PF03564	brenneri	Protein of unknown function (DUF1759)
6	PF03564	angaria	Protein of unknown function (DUF1759)
5	PF03546	orang	Treacher Collins syndrome protein Treacle
15	PF03546	human	Treacher Collins syndrome protein Treacle
4	PF03530	remanei	Calcium-activated SK potassium channel	GO:small conductance calcium-activated potassium channel activity ; GO:0016286 GO:potassium ion transport ; GO:0006813 GO:integral component of membrane ; GO:0016021
4	PF03530	orang	Calcium-activated SK potassium channel	GO:small conductance calcium-activated potassium channel activity ; GO:0016286 GO:potassium ion transport ; GO:0006813 GO:integral component of membrane ; GO:0016021
8	PF03530	japonica	Calcium-activated SK potassium channel	GO:small conductance calcium-activated potassium channel activity ; GO:0016286 GO:potassium ion transport ; GO:0006813 GO:integral component of membrane ; GO:0016021
14	PF03530	human	Calcium-activated SK potassium channel	GO:small conductance calcium-activated potassium channel activity ; GO:0016286 GO:potassium ion transport ; GO:0006813 GO:integral component of membrane ; GO:0016021
4	PF03530	gorilla	Calcium-activated SK potassium channel	GO:small conductance calcium-activated potassium channel activity ; GO:0016286 GO:potassium ion transport ; GO:0006813 GO:integral component of membrane ; GO:0016021
20	PF03530	elegans	Calcium-activated SK potassium channel	GO:small conductance calcium-activated potassium channel activity ; GO:0016286 GO:potassium ion transport ; GO:0006813 GO:integral component of membrane ; GO:0016021
7	PF03530	chimp	Calcium-activated SK potassium channel	GO:small conductance calcium-activated potassium channel activity ; GO:0016286 GO:potassium ion transport ; GO:0006813 GO:integral component of membrane ; GO:0016021
5	PF03530	briggsae	Calcium-activated SK potassium channel	GO:small conductance calcium-activated potassium channel activity ; GO:0016286 GO:potassium ion transport ; GO:0006813 GO:integral component of membrane ; GO:0016021
4	PF03530	brenneri	Calcium-activated SK potassium channel	GO:small conductance calcium-activated potassium channel activity ; GO:0016286 GO:potassium ion transport ; GO:0006813 GO:integral component of membrane ; GO:0016021
6	PF03530	bonobo	Calcium-activated SK potassium channel	GO:small conductance calcium-activated potassium channel activity ; GO:0016286 GO:potassium ion transport ; GO:0006813 GO:integral component of membrane ; GO:0016021
6	PF03530	angaria	Calcium-activated SK potassium channel	GO:small conductance calcium-activated potassium channel activity ; GO:0016286 GO:potassium ion transport ; GO:0006813 GO:integral component of membrane ; GO:0016021
23	PF03530	Dsimulans	Calcium-activated SK potassium channel	GO:small conductance calcium-activated potassium channel activity ; GO:0016286 GO:potassium ion transport ; GO:0006813 GO:integral component of membrane ; GO:0016021
14	PF03530	Dmelano	Calcium-activated SK potassium channel	GO:small conductance calcium-activated potassium channel activity ; GO:0016286 GO:potassium ion transport ; GO:0006813 GO:integral component of membrane ; GO:0016021
10	PF03530	Derecta	Calcium-activated SK potassium channel	GO:small conductance calcium-activated potassium channel activity ; GO:0016286 GO:potassium ion transport ; GO:0006813 GO:integral component of membrane ; GO:0016021
2	PF03493	remanei	Calcium-activated BK potassium channel alpha subunit	GO:calcium-activated potassium channel activity ; GO:0015269 GO:potassium ion transport ; GO:0006813 GO:membrane ; GO:0016020
4	PF03493	orang	Calcium-activated BK potassium channel alpha subunit	GO:calcium-activated potassium channel activity ; GO:0015269 GO:potassium ion transport ; GO:0006813 GO:membrane ; GO:0016020
3	PF03493	japonica	Calcium-activated BK potassium channel alpha subunit	GO:calcium-activated potassium channel activity ; GO:0015269 GO:potassium ion transport ; GO:0006813 GO:membrane ; GO:0016020
50	PF03493	human	Calcium-activated BK potassium channel alpha subunit	GO:calcium-activated potassium channel activity ; GO:0015269 GO:potassium ion transport ; GO:0006813 GO:membrane ; GO:0016020
6	PF03493	gorilla	Calcium-activated BK potassium channel alpha subunit	GO:calcium-activated potassium channel activity ; GO:0015269 GO:potassium ion transport ; GO:0006813 GO:membrane ; GO:0016020
21	PF03493	elegans	Calcium-activated BK potassium channel alpha subunit	GO:calcium-activated potassium channel activity ; GO:0015269 GO:potassium ion transport ; GO:0006813 GO:membrane ; GO:0016020
9	PF03493	chimp	Calcium-activated BK potassium channel alpha subunit	GO:calcium-activated potassium channel activity ; GO:0015269 GO:potassium ion transport ; GO:0006813 GO:membrane ; GO:0016020
2	PF03493	briggsae	Calcium-activated BK potassium channel alpha subunit	GO:calcium-activated potassium channel activity ; GO:0015269 GO:potassium ion transport ; GO:0006813 GO:membrane ; GO:0016020
2	PF03493	brenneri	Calcium-activated BK potassium channel alpha subunit	GO:calcium-activated potassium channel activity ; GO:0015269 GO:potassium ion transport ; GO:0006813 GO:membrane ; GO:0016020
7	PF03493	bonobo	Calcium-activated BK potassium channel alpha subunit	GO:calcium-activated potassium channel activity ; GO:0015269 GO:potassium ion transport ; GO:0006813 GO:membrane ; GO:0016020
4	PF03493	angaria	Calcium-activated BK potassium channel alpha subunit	GO:calcium-activated potassium channel activity ; GO:0015269 GO:potassium ion transport ; GO:0006813 GO:membrane ; GO:0016020
48	PF03493	Dsimulans	Calcium-activated BK potassium channel alpha subunit	GO:calcium-activated potassium channel activity ; GO:0015269 GO:potassium ion transport ; GO:0006813 GO:membrane ; GO:0016020
36	PF03493	Dpseudo	Calcium-activated BK potassium channel alpha subunit	GO:calcium-activated potassium channel activity ; GO:0015269 GO:potassium ion transport ; GO:0006813 GO:membrane ; GO:0016020
32	PF03493	Dmelano	Calcium-activated BK potassium channel alpha subunit	GO:calcium-activated potassium channel activity ; GO:0015269 GO:potassium ion transport ; GO:0006813 GO:membrane ; GO:0016020
41	PF03493	Derecta	Calcium-activated BK potassium channel alpha subunit	GO:calcium-activated potassium channel activity ; GO:0015269 GO:potassium ion transport ; GO:0006813 GO:membrane ; GO:0016020
22	PF03488	remanei	Nematode insulin-related peptide beta type	GO:hormone activity ; GO:0005179 GO:extracellular region ; GO:0005576
12	PF03488	japonica	Nematode insulin-related peptide beta type	GO:hormone activity ; GO:0005179 GO:extracellular region ; GO:0005576
28	PF03488	elegans	Nematode insulin-related peptide beta type	GO:hormone activity ; GO:0005179 GO:extracellular region ; GO:0005576
27	PF03488	briggsae	Nematode insulin-related peptide beta type	GO:hormone activity ; GO:0005179 GO:extracellular region ; GO:0005576
28	PF03488	brenneri	Nematode insulin-related peptide beta type	GO:hormone activity ; GO:0005179 GO:extracellular region ; GO:0005576
5	PF03466	remanei	LysR substrate binding domain
25	PF03466	angaria	LysR substrate binding domain
11	PF03454	human	MoeA C-terminal region (domain IV)	GO:molybdopterin cofactor biosynthetic process ; GO:0032324
21	PF03454	chimp	MoeA C-terminal region (domain IV)	GO:molybdopterin cofactor biosynthetic process ; GO:0032324
8	PF03454	bonobo	MoeA C-terminal region (domain IV)	GO:molybdopterin cofactor biosynthetic process ; GO:0032324
3	PF03453	remanei	MoeA N-terminal region (domain I and II)	GO:molybdopterin cofactor biosynthetic process ; GO:0032324
2	PF03453	japonica	MoeA N-terminal region (domain I and II)	GO:molybdopterin cofactor biosynthetic process ; GO:0032324
11	PF03453	human	MoeA N-terminal region (domain I and II)	GO:molybdopterin cofactor biosynthetic process ; GO:0032324
2	PF03453	elegans	MoeA N-terminal region (domain I and II)	GO:molybdopterin cofactor biosynthetic process ; GO:0032324
21	PF03453	chimp	MoeA N-terminal region (domain I and II)	GO:molybdopterin cofactor biosynthetic process ; GO:0032324
2	PF03453	briggsae	MoeA N-terminal region (domain I and II)	GO:molybdopterin cofactor biosynthetic process ; GO:0032324
8	PF03453	bonobo	MoeA N-terminal region (domain I and II)	GO:molybdopterin cofactor biosynthetic process ; GO:0032324
4	PF03453	angaria	MoeA N-terminal region (domain I and II)	GO:molybdopterin cofactor biosynthetic process ; GO:0032324
26	PF03436	remanei	Domain of unknown function (DUF281)
2	PF03436	japonica	Domain of unknown function (DUF281)
15	PF03436	elegans	Domain of unknown function (DUF281)
3	PF03436	briggsae	Domain of unknown function (DUF281)
16	PF03436	brenneri	Domain of unknown function (DUF281)
30	PF03409	remanei	Transmembrane glycoprotein
7	PF03409	japonica	Transmembrane glycoprotein
27	PF03409	elegans	Transmembrane glycoprotein
14	PF03409	briggsae	Transmembrane glycoprotein
33	PF03409	brenneri	Transmembrane glycoprotein
16	PF03409	angaria	Transmembrane glycoprotein
5	PF03399	remanei	SAC3/GANP/Nin1/mts3/eIF-3 p25 family
4	PF03399	orang	SAC3/GANP/Nin1/mts3/eIF-3 p25 family
4	PF03399	japonica	SAC3/GANP/Nin1/mts3/eIF-3 p25 family
7	PF03399	human	SAC3/GANP/Nin1/mts3/eIF-3 p25 family
3	PF03399	gorilla	SAC3/GANP/Nin1/mts3/eIF-3 p25 family
4	PF03399	elegans	SAC3/GANP/Nin1/mts3/eIF-3 p25 family
9	PF03399	chimp	SAC3/GANP/Nin1/mts3/eIF-3 p25 family
3	PF03399	briggsae	SAC3/GANP/Nin1/mts3/eIF-3 p25 family
3	PF03399	brenneri	SAC3/GANP/Nin1/mts3/eIF-3 p25 family
3	PF03399	bonobo	SAC3/GANP/Nin1/mts3/eIF-3 p25 family
2	PF03399	angaria	SAC3/GANP/Nin1/mts3/eIF-3 p25 family
3	PF03399	Dsimulans	SAC3/GANP/Nin1/mts3/eIF-3 p25 family
3	PF03399	Dpseudo	SAC3/GANP/Nin1/mts3/eIF-3 p25 family
3	PF03399	Dmelano	SAC3/GANP/Nin1/mts3/eIF-3 p25 family
4	PF03399	Derecta	SAC3/GANP/Nin1/mts3/eIF-3 p25 family
12	PF03380	remanei	Caenorhabditis protein of unknown function
19	PF03380	elegans	Caenorhabditis protein of unknown function
10	PF03380	briggsae	Caenorhabditis protein of unknown function
16	PF03380	brenneri	Caenorhabditis protein of unknown function
24	PF03372	remanei	Endonuclease/Exonuclease/phosphatase family
40	PF03372	orang	Endonuclease/Exonuclease/phosphatase family
98	PF03372	human	Endonuclease/Exonuclease/phosphatase family
35	PF03372	gorilla	Endonuclease/Exonuclease/phosphatase family
20	PF03372	elegans	Endonuclease/Exonuclease/phosphatase family
74	PF03372	chimp	Endonuclease/Exonuclease/phosphatase family
13	PF03372	briggsae	Endonuclease/Exonuclease/phosphatase family
19	PF03372	brenneri	Endonuclease/Exonuclease/phosphatase family
52	PF03372	bonobo	Endonuclease/Exonuclease/phosphatase family
17	PF03372	angaria	Endonuclease/Exonuclease/phosphatase family
29	PF03372	Dsimulans	Endonuclease/Exonuclease/phosphatase family
22	PF03372	Dpseudo	Endonuclease/Exonuclease/phosphatase family
25	PF03372	Dmelano	Endonuclease/Exonuclease/phosphatase family
23	PF03372	Derecta	Endonuclease/Exonuclease/phosphatase family
40	PF03353	remanei	Ras-mediated vulval-induction antagonist
5	PF03353	japonica	Ras-mediated vulval-induction antagonist
21	PF03353	elegans	Ras-mediated vulval-induction antagonist
9	PF03353	briggsae	Ras-mediated vulval-induction antagonist
22	PF03353	brenneri	Ras-mediated vulval-induction antagonist
3	PF03194	remanei	LUC7 N_terminus	GO:mRNA binding ; GO:0003729 GO:mRNA splice site selection ; GO:0006376 GO:U1 snRNP ; GO:0005685
2	PF03194	orang	LUC7 N_terminus	GO:mRNA binding ; GO:0003729 GO:mRNA splice site selection ; GO:0006376 GO:U1 snRNP ; GO:0005685
4	PF03194	japonica	LUC7 N_terminus	GO:mRNA binding ; GO:0003729 GO:mRNA splice site selection ; GO:0006376 GO:U1 snRNP ; GO:0005685
17	PF03194	human	LUC7 N_terminus	GO:mRNA binding ; GO:0003729 GO:mRNA splice site selection ; GO:0006376 GO:U1 snRNP ; GO:0005685
5	PF03194	gorilla	LUC7 N_terminus	GO:mRNA binding ; GO:0003729 GO:mRNA splice site selection ; GO:0006376 GO:U1 snRNP ; GO:0005685
6	PF03194	elegans	LUC7 N_terminus	GO:mRNA binding ; GO:0003729 GO:mRNA splice site selection ; GO:0006376 GO:U1 snRNP ; GO:0005685
17	PF03194	chimp	LUC7 N_terminus	GO:mRNA binding ; GO:0003729 GO:mRNA splice site selection ; GO:0006376 GO:U1 snRNP ; GO:0005685
3	PF03194	briggsae	LUC7 N_terminus	GO:mRNA binding ; GO:0003729 GO:mRNA splice site selection ; GO:0006376 GO:U1 snRNP ; GO:0005685
4	PF03194	brenneri	LUC7 N_terminus	GO:mRNA binding ; GO:0003729 GO:mRNA splice site selection ; GO:0006376 GO:U1 snRNP ; GO:0005685
14	PF03194	bonobo	LUC7 N_terminus	GO:mRNA binding ; GO:0003729 GO:mRNA splice site selection ; GO:0006376 GO:U1 snRNP ; GO:0005685
4	PF03194	angaria	LUC7 N_terminus	GO:mRNA binding ; GO:0003729 GO:mRNA splice site selection ; GO:0006376 GO:U1 snRNP ; GO:0005685
2	PF03194	Dsimulans	LUC7 N_terminus	GO:mRNA binding ; GO:0003729 GO:mRNA splice site selection ; GO:0006376 GO:U1 snRNP ; GO:0005685
2	PF03194	Dpseudo	LUC7 N_terminus	GO:mRNA binding ; GO:0003729 GO:mRNA splice site selection ; GO:0006376 GO:U1 snRNP ; GO:0005685
2	PF03194	Dmelano	LUC7 N_terminus	GO:mRNA binding ; GO:0003729 GO:mRNA splice site selection ; GO:0006376 GO:U1 snRNP ; GO:0005685
2	PF03194	Derecta	LUC7 N_terminus	GO:mRNA binding ; GO:0003729 GO:mRNA splice site selection ; GO:0006376 GO:U1 snRNP ; GO:0005685
19	PF03184	remanei	DDE superfamily endonuclease	GO:nucleic acid binding ; GO:0003676
16	PF03184	orang	DDE superfamily endonuclease	GO:nucleic acid binding ; GO:0003676
11	PF03184	japonica	DDE superfamily endonuclease	GO:nucleic acid binding ; GO:0003676
24	PF03184	human	DDE superfamily endonuclease	GO:nucleic acid binding ; GO:0003676
13	PF03184	gorilla	DDE superfamily endonuclease	GO:nucleic acid binding ; GO:0003676
18	PF03184	chimp	DDE superfamily endonuclease	GO:nucleic acid binding ; GO:0003676
4	PF03184	briggsae	DDE superfamily endonuclease	GO:nucleic acid binding ; GO:0003676
16	PF03184	brenneri	DDE superfamily endonuclease	GO:nucleic acid binding ; GO:0003676
19	PF03184	bonobo	DDE superfamily endonuclease	GO:nucleic acid binding ; GO:0003676
3	PF03184	angaria	DDE superfamily endonuclease	GO:nucleic acid binding ; GO:0003676
57	PF03175	remanei	DNA polymerase type B	GO:nucleotide binding ; GO:0000166 GO:DNA binding ; GO:0003677 GO:DNA-directed DNA polymerase activity ; GO:0003887 GO:3'-5' exonuclease activity ; GO:0008408 GO:DNA replication ; GO:0006260
29	PF03175	brenneri	DNA polymerase type B	GO:nucleotide binding ; GO:0000166 GO:DNA binding ; GO:0003677 GO:DNA-directed DNA polymerase activity ; GO:0003887 GO:3'-5' exonuclease activity ; GO:0008408 GO:DNA replication ; GO:0006260
4	PF03175	angaria	DNA polymerase type B	GO:nucleotide binding ; GO:0000166 GO:DNA binding ; GO:0003677 GO:DNA-directed DNA polymerase activity ; GO:0003887 GO:3'-5' exonuclease activity ; GO:0008408 GO:DNA replication ; GO:0006260
6	PF03137	remanei	Organic Anion Transporter Polypeptide (OATP) family	GO:transporter activity ; GO:0005215 GO:transport ; GO:0006810 GO:membrane ; GO:0016020
21	PF03137	orang	Organic Anion Transporter Polypeptide (OATP) family	GO:transporter activity ; GO:0005215 GO:transport ; GO:0006810 GO:membrane ; GO:0016020
9	PF03137	japonica	Organic Anion Transporter Polypeptide (OATP) family	GO:transporter activity ; GO:0005215 GO:transport ; GO:0006810 GO:membrane ; GO:0016020
51	PF03137	human	Organic Anion Transporter Polypeptide (OATP) family	GO:transporter activity ; GO:0005215 GO:transport ; GO:0006810 GO:membrane ; GO:0016020
15	PF03137	gorilla	Organic Anion Transporter Polypeptide (OATP) family	GO:transporter activity ; GO:0005215 GO:transport ; GO:0006810 GO:membrane ; GO:0016020
11	PF03137	elegans	Organic Anion Transporter Polypeptide (OATP) family	GO:transporter activity ; GO:0005215 GO:transport ; GO:0006810 GO:membrane ; GO:0016020
34	PF03137	chimp	Organic Anion Transporter Polypeptide (OATP) family	GO:transporter activity ; GO:0005215 GO:transport ; GO:0006810 GO:membrane ; GO:0016020
6	PF03137	briggsae	Organic Anion Transporter Polypeptide (OATP) family	GO:transporter activity ; GO:0005215 GO:transport ; GO:0006810 GO:membrane ; GO:0016020
6	PF03137	brenneri	Organic Anion Transporter Polypeptide (OATP) family	GO:transporter activity ; GO:0005215 GO:transport ; GO:0006810 GO:membrane ; GO:0016020
20	PF03137	bonobo	Organic Anion Transporter Polypeptide (OATP) family	GO:transporter activity ; GO:0005215 GO:transport ; GO:0006810 GO:membrane ; GO:0016020
14	PF03137	angaria	Organic Anion Transporter Polypeptide (OATP) family	GO:transporter activity ; GO:0005215 GO:transport ; GO:0006810 GO:membrane ; GO:0016020
10	PF03137	Dsimulans	Organic Anion Transporter Polypeptide (OATP) family	GO:transporter activity ; GO:0005215 GO:transport ; GO:0006810 GO:membrane ; GO:0016020
10	PF03137	Dpseudo	Organic Anion Transporter Polypeptide (OATP) family	GO:transporter activity ; GO:0005215 GO:transport ; GO:0006810 GO:membrane ; GO:0016020
9	PF03137	Dmelano	Organic Anion Transporter Polypeptide (OATP) family	GO:transporter activity ; GO:0005215 GO:transport ; GO:0006810 GO:membrane ; GO:0016020
9	PF03137	Derecta	Organic Anion Transporter Polypeptide (OATP) family	GO:transporter activity ; GO:0005215 GO:transport ; GO:0006810 GO:membrane ; GO:0016020
3	PF03131	remanei	bZIP Maf transcription factor	GO:DNA binding ; GO:0003677 GO:regulation of transcription
15	PF03131	orang	bZIP Maf transcription factor	GO:DNA binding ; GO:0003677 GO:regulation of transcription
3	PF03131	japonica	bZIP Maf transcription factor	GO:DNA binding ; GO:0003677 GO:regulation of transcription
25	PF03131	human	bZIP Maf transcription factor	GO:DNA binding ; GO:0003677 GO:regulation of transcription
15	PF03131	gorilla	bZIP Maf transcription factor	GO:DNA binding ; GO:0003677 GO:regulation of transcription
6	PF03131	elegans	bZIP Maf transcription factor	GO:DNA binding ; GO:0003677 GO:regulation of transcription
17	PF03131	chimp	bZIP Maf transcription factor	GO:DNA binding ; GO:0003677 GO:regulation of transcription
2	PF03131	briggsae	bZIP Maf transcription factor	GO:DNA binding ; GO:0003677 GO:regulation of transcription
3	PF03131	brenneri	bZIP Maf transcription factor	GO:DNA binding ; GO:0003677 GO:regulation of transcription
24	PF03131	bonobo	bZIP Maf transcription factor	GO:DNA binding ; GO:0003677 GO:regulation of transcription
3	PF03131	angaria	bZIP Maf transcription factor	GO:DNA binding ; GO:0003677 GO:regulation of transcription
2	PF03131	Dsimulans	bZIP Maf transcription factor	GO:DNA binding ; GO:0003677 GO:regulation of transcription
8	PF03131	Dpseudo	bZIP Maf transcription factor	GO:DNA binding ; GO:0003677 GO:regulation of transcription
11	PF03131	Dmelano	bZIP Maf transcription factor	GO:DNA binding ; GO:0003677 GO:regulation of transcription
5	PF03131	Derecta	bZIP Maf transcription factor	GO:DNA binding ; GO:0003677 GO:regulation of transcription
14	PF02947	human	flt3 ligand	GO:cytokine activity ; GO:0005125 GO:membrane ; GO:0016020
2	PF02947	bonobo	flt3 ligand	GO:cytokine activity ; GO:0005125 GO:membrane ; GO:0016020
5	PF02946	orang	GTF2I-like repeat
25	PF02946	human	GTF2I-like repeat
8	PF02946	gorilla	GTF2I-like repeat
16	PF02946	chimp	GTF2I-like repeat
6	PF02946	bonobo	GTF2I-like repeat
4	PF02888	remanei	Calmodulin binding domain	GO:calmodulin binding ; GO:0005516 GO:calcium-activated potassium channel activity ; GO:0015269 GO:potassium ion transport ; GO:0006813 GO:integral component of membrane ; GO:0016021
3	PF02888	orang	Calmodulin binding domain	GO:calmodulin binding ; GO:0005516 GO:calcium-activated potassium channel activity ; GO:0015269 GO:potassium ion transport ; GO:0006813 GO:integral component of membrane ; GO:0016021
8	PF02888	japonica	Calmodulin binding domain	GO:calmodulin binding ; GO:0005516 GO:calcium-activated potassium channel activity ; GO:0015269 GO:potassium ion transport ; GO:0006813 GO:integral component of membrane ; GO:0016021
15	PF02888	human	Calmodulin binding domain	GO:calmodulin binding ; GO:0005516 GO:calcium-activated potassium channel activity ; GO:0015269 GO:potassium ion transport ; GO:0006813 GO:integral component of membrane ; GO:0016021
5	PF02888	gorilla	Calmodulin binding domain	GO:calmodulin binding ; GO:0005516 GO:calcium-activated potassium channel activity ; GO:0015269 GO:potassium ion transport ; GO:0006813 GO:integral component of membrane ; GO:0016021
20	PF02888	elegans	Calmodulin binding domain	GO:calmodulin binding ; GO:0005516 GO:calcium-activated potassium channel activity ; GO:0015269 GO:potassium ion transport ; GO:0006813 GO:integral component of membrane ; GO:0016021
7	PF02888	chimp	Calmodulin binding domain	GO:calmodulin binding ; GO:0005516 GO:calcium-activated potassium channel activity ; GO:0015269 GO:potassium ion transport ; GO:0006813 GO:integral component of membrane ; GO:0016021
5	PF02888	briggsae	Calmodulin binding domain	GO:calmodulin binding ; GO:0005516 GO:calcium-activated potassium channel activity ; GO:0015269 GO:potassium ion transport ; GO:0006813 GO:integral component of membrane ; GO:0016021
4	PF02888	brenneri	Calmodulin binding domain	GO:calmodulin binding ; GO:0005516 GO:calcium-activated potassium channel activity ; GO:0015269 GO:potassium ion transport ; GO:0006813 GO:integral component of membrane ; GO:0016021
6	PF02888	bonobo	Calmodulin binding domain	GO:calmodulin binding ; GO:0005516 GO:calcium-activated potassium channel activity ; GO:0015269 GO:potassium ion transport ; GO:0006813 GO:integral component of membrane ; GO:0016021
6	PF02888	angaria	Calmodulin binding domain	GO:calmodulin binding ; GO:0005516 GO:calcium-activated potassium channel activity ; GO:0015269 GO:potassium ion transport ; GO:0006813 GO:integral component of membrane ; GO:0016021
21	PF02888	Dsimulans	Calmodulin binding domain	GO:calmodulin binding ; GO:0005516 GO:calcium-activated potassium channel activity ; GO:0015269 GO:potassium ion transport ; GO:0006813 GO:integral component of membrane ; GO:0016021
14	PF02888	Dmelano	Calmodulin binding domain	GO:calmodulin binding ; GO:0005516 GO:calcium-activated potassium channel activity ; GO:0015269 GO:potassium ion transport ; GO:0006813 GO:integral component of membrane ; GO:0016021
10	PF02888	Derecta	Calmodulin binding domain	GO:calmodulin binding ; GO:0005516 GO:calcium-activated potassium channel activity ; GO:0015269 GO:potassium ion transport ; GO:0006813 GO:integral component of membrane ; GO:0016021
2	PF02822	remanei	Antistasin family	GO:serine-type endopeptidase inhibitor activity ; GO:0004867
2	PF02822	japonica	Antistasin family	GO:serine-type endopeptidase inhibitor activity ; GO:0004867
6	PF02822	human	Antistasin family	GO:serine-type endopeptidase inhibitor activity ; GO:0004867
6	PF02822	elegans	Antistasin family	GO:serine-type endopeptidase inhibitor activity ; GO:0004867
2	PF02822	briggsae	Antistasin family	GO:serine-type endopeptidase inhibitor activity ; GO:0004867
3	PF02822	bonobo	Antistasin family	GO:serine-type endopeptidase inhibitor activity ; GO:0004867
3	PF02822	angaria	Antistasin family	GO:serine-type endopeptidase inhibitor activity ; GO:0004867
3	PF02776	remanei	Thiamine pyrophosphate enzyme	GO:thiamine pyrophosphate binding ; GO:0030976
6	PF02776	orang	Thiamine pyrophosphate enzyme	GO:thiamine pyrophosphate binding ; GO:0030976
2	PF02776	japonica	Thiamine pyrophosphate enzyme	GO:thiamine pyrophosphate binding ; GO:0030976
6	PF02776	human	Thiamine pyrophosphate enzyme	GO:thiamine pyrophosphate binding ; GO:0030976
5	PF02776	gorilla	Thiamine pyrophosphate enzyme	GO:thiamine pyrophosphate binding ; GO:0030976
3	PF02776	elegans	Thiamine pyrophosphate enzyme	GO:thiamine pyrophosphate binding ; GO:0030976
4	PF02776	chimp	Thiamine pyrophosphate enzyme	GO:thiamine pyrophosphate binding ; GO:0030976
2	PF02776	briggsae	Thiamine pyrophosphate enzyme	GO:thiamine pyrophosphate binding ; GO:0030976
5	PF02776	brenneri	Thiamine pyrophosphate enzyme	GO:thiamine pyrophosphate binding ; GO:0030976
2	PF02776	bonobo	Thiamine pyrophosphate enzyme	GO:thiamine pyrophosphate binding ; GO:0030976
23	PF02776	angaria	Thiamine pyrophosphate enzyme	GO:thiamine pyrophosphate binding ; GO:0030976
13	PF02755	orang	RPEL repeat
43	PF02755	human	RPEL repeat
11	PF02755	gorilla	RPEL repeat
39	PF02755	chimp	RPEL repeat
2	PF02755	brenneri	RPEL repeat
17	PF02755	bonobo	RPEL repeat
18	PF02755	Dsimulans	RPEL repeat
4	PF02755	Dpseudo	RPEL repeat
11	PF02755	Dmelano	RPEL repeat
13	PF02755	Derecta	RPEL repeat
2	PF02653	remanei	Branched-chain amino acid transport system / permease component	GO:transporter activity ; GO:0005215 GO:transport ; GO:0006810 GO:membrane ; GO:0016020
17	PF02653	angaria	Branched-chain amino acid transport system / permease component	GO:transporter activity ; GO:0005215 GO:transport ; GO:0006810 GO:membrane ; GO:0016020
8	PF02518	remanei	Histidine kinase-
18	PF02518	orang	Histidine kinase-
10	PF02518	japonica	Histidine kinase-
35	PF02518	human	Histidine kinase-
15	PF02518	gorilla	Histidine kinase-
9	PF02518	elegans	Histidine kinase-
28	PF02518	chimp	Histidine kinase-
6	PF02518	briggsae	Histidine kinase-
6	PF02518	brenneri	Histidine kinase-
15	PF02518	bonobo	Histidine kinase-
38	PF02518	angaria	Histidine kinase-
6	PF02518	Dsimulans	Histidine kinase-
6	PF02518	Dpseudo	Histidine kinase-
7	PF02518	Dmelano	Histidine kinase-
6	PF02518	Derecta	Histidine kinase-
7	PF02492	orang	CobW/HypB/UreG
36	PF02492	human	CobW/HypB/UreG
16	PF02492	chimp	CobW/HypB/UreG
34	PF02460	remanei	Patched family	GO:hedgehog receptor activity ; GO:0008158 GO:membrane ; GO:0016020
12	PF02460	orang	Patched family	GO:hedgehog receptor activity ; GO:0008158 GO:membrane ; GO:0016020
63	PF02460	japonica	Patched family	GO:hedgehog receptor activity ; GO:0008158 GO:membrane ; GO:0016020
40	PF02460	human	Patched family	GO:hedgehog receptor activity ; GO:0008158 GO:membrane ; GO:0016020
11	PF02460	gorilla	Patched family	GO:hedgehog receptor activity ; GO:0008158 GO:membrane ; GO:0016020
40	PF02460	elegans	Patched family	GO:hedgehog receptor activity ; GO:0008158 GO:membrane ; GO:0016020
17	PF02460	chimp	Patched family	GO:hedgehog receptor activity ; GO:0008158 GO:membrane ; GO:0016020
31	PF02460	briggsae	Patched family	GO:hedgehog receptor activity ; GO:0008158 GO:membrane ; GO:0016020
42	PF02460	brenneri	Patched family	GO:hedgehog receptor activity ; GO:0008158 GO:membrane ; GO:0016020
17	PF02460	bonobo	Patched family	GO:hedgehog receptor activity ; GO:0008158 GO:membrane ; GO:0016020
69	PF02460	angaria	Patched family	GO:hedgehog receptor activity ; GO:0008158 GO:membrane ; GO:0016020
6	PF02460	Dsimulans	Patched family	GO:hedgehog receptor activity ; GO:0008158 GO:membrane ; GO:0016020
5	PF02460	Dpseudo	Patched family	GO:hedgehog receptor activity ; GO:0008158 GO:membrane ; GO:0016020
6	PF02460	Dmelano	Patched family	GO:hedgehog receptor activity ; GO:0008158 GO:membrane ; GO:0016020
5	PF02460	Derecta	Patched family	GO:hedgehog receptor activity ; GO:0008158 GO:membrane ; GO:0016020
67	PF02408	remanei	CUB-like domain
21	PF02408	japonica	CUB-like domain
64	PF02408	elegans	CUB-like domain
39	PF02408	briggsae	CUB-like domain
64	PF02408	brenneri	CUB-like domain
11	PF02408	angaria	CUB-like domain
69	PF02376	remanei	CUT domain	GO:DNA binding ; GO:0003677
6	PF02376	orang	CUT domain	GO:DNA binding ; GO:0003677
9	PF02376	japonica	CUT domain	GO:DNA binding ; GO:0003677
29	PF02376	human	CUT domain	GO:DNA binding ; GO:0003677
7	PF02376	gorilla	CUT domain	GO:DNA binding ; GO:0003677
7	PF02376	elegans	CUT domain	GO:DNA binding ; GO:0003677
13	PF02376	chimp	CUT domain	GO:DNA binding ; GO:0003677
17	PF02376	briggsae	CUT domain	GO:DNA binding ; GO:0003677
17	PF02376	brenneri	CUT domain	GO:DNA binding ; GO:0003677
8	PF02376	bonobo	CUT domain	GO:DNA binding ; GO:0003677
4	PF02376	angaria	CUT domain	GO:DNA binding ; GO:0003677
2	PF02376	Dsimulans	CUT domain	GO:DNA binding ; GO:0003677
5	PF02376	Dmelano	CUT domain	GO:DNA binding ; GO:0003677
4	PF02376	Derecta	CUT domain	GO:DNA binding ; GO:0003677
33	PF02343	remanei	TRA-1 regulated protein R03H10.4
41	PF02343	elegans	TRA-1 regulated protein R03H10.4
4	PF02343	briggsae	TRA-1 regulated protein R03H10.4
16	PF02343	brenneri	TRA-1 regulated protein R03H10.4
49	PF02214	remanei	BTB/POZ domain	GO:protein homooligomerization ; GO:0051260
77	PF02214	orang	BTB/POZ domain	GO:protein homooligomerization ; GO:0051260
24	PF02214	japonica	BTB/POZ domain	GO:protein homooligomerization ; GO:0051260
57	PF02214	gorilla	BTB/POZ domain	GO:protein homooligomerization ; GO:0051260
82	PF02214	elegans	BTB/POZ domain	GO:protein homooligomerization ; GO:0051260
75	PF02214	chimp	BTB/POZ domain	GO:protein homooligomerization ; GO:0051260
29	PF02214	briggsae	BTB/POZ domain	GO:protein homooligomerization ; GO:0051260
33	PF02214	brenneri	BTB/POZ domain	GO:protein homooligomerization ; GO:0051260
68	PF02214	bonobo	BTB/POZ domain	GO:protein homooligomerization ; GO:0051260
25	PF02214	angaria	BTB/POZ domain	GO:protein homooligomerization ; GO:0051260
21	PF02214	Dsimulans	BTB/POZ domain	GO:protein homooligomerization ; GO:0051260
24	PF02214	Dpseudo	BTB/POZ domain	GO:protein homooligomerization ; GO:0051260
37	PF02214	Dmelano	BTB/POZ domain	GO:protein homooligomerization ; GO:0051260
44	PF02214	Derecta	BTB/POZ domain	GO:protein homooligomerization ; GO:0051260
6	PF02208	orang	Sorbin homologous domain
94	PF02208	human	Sorbin homologous domain
14	PF02208	gorilla	Sorbin homologous domain
73	PF02208	chimp	Sorbin homologous domain
28	PF02208	bonobo	Sorbin homologous domain
24	PF02208	Dpseudo	Sorbin homologous domain
6	PF02208	Dmelano	Sorbin homologous domain
10	PF02208	Derecta	Sorbin homologous domain
80	PF02206	japonica	Domain of unknown function
58	PF02206	elegans	Domain of unknown function
26	PF02206	briggsae	Domain of unknown function
87	PF02206	brenneri	Domain of unknown function
7	PF02185	orang	Hr1 repeat	GO:signal transduction ; GO:0007165
28	PF02185	human	Hr1 repeat	GO:signal transduction ; GO:0007165
6	PF02185	gorilla	Hr1 repeat	GO:signal transduction ; GO:0007165
2	PF02185	elegans	Hr1 repeat	GO:signal transduction ; GO:0007165
6	PF02185	chimp	Hr1 repeat	GO:signal transduction ; GO:0007165
9	PF02185	bonobo	Hr1 repeat	GO:signal transduction ; GO:0007165
2	PF02185	angaria	Hr1 repeat	GO:signal transduction ; GO:0007165
2	PF02185	Dsimulans	Hr1 repeat	GO:signal transduction ; GO:0007165
2	PF02185	Dpseudo	Hr1 repeat	GO:signal transduction ; GO:0007165
14	PF02185	Dmelano	Hr1 repeat	GO:signal transduction ; GO:0007165
11	PF02185	Derecta	Hr1 repeat	GO:signal transduction ; GO:0007165
9	PF02178	orang	AT hook motif	GO:DNA binding ; GO:0003677
3	PF02178	japonica	AT hook motif	GO:DNA binding ; GO:0003677
5	PF02178	human	AT hook motif	GO:DNA binding ; GO:0003677
5	PF02178	gorilla	AT hook motif	GO:DNA binding ; GO:0003677
2	PF02178	chimp	AT hook motif	GO:DNA binding ; GO:0003677
2	PF02178	brenneri	AT hook motif	GO:DNA binding ; GO:0003677
2	PF02178	Derecta	AT hook motif	GO:DNA binding ; GO:0003677
18	PF02175	remanei	Serpentine type 7TM GPCR chemoreceptor Srb	GO:transmembrane signaling receptor activity ; GO:0004888 GO:sensory perception of chemical stimulus ; GO:0007606 GO:integral component of membrane ; GO:0016021
8	PF02175	japonica	Serpentine type 7TM GPCR chemoreceptor Srb	GO:transmembrane signaling receptor activity ; GO:0004888 GO:sensory perception of chemical stimulus ; GO:0007606 GO:integral component of membrane ; GO:0016021
12	PF02175	elegans	Serpentine type 7TM GPCR chemoreceptor Srb	GO:transmembrane signaling receptor activity ; GO:0004888 GO:sensory perception of chemical stimulus ; GO:0007606 GO:integral component of membrane ; GO:0016021
12	PF02175	briggsae	Serpentine type 7TM GPCR chemoreceptor Srb	GO:transmembrane signaling receptor activity ; GO:0004888 GO:sensory perception of chemical stimulus ; GO:0007606 GO:integral component of membrane ; GO:0016021
12	PF02175	brenneri	Serpentine type 7TM GPCR chemoreceptor Srb	GO:transmembrane signaling receptor activity ; GO:0004888 GO:sensory perception of chemical stimulus ; GO:0007606 GO:integral component of membrane ; GO:0016021
3	PF02175	angaria	Serpentine type 7TM GPCR chemoreceptor Srb	GO:transmembrane signaling receptor activity ; GO:0004888 GO:sensory perception of chemical stimulus ; GO:0007606 GO:integral component of membrane ; GO:0016021
40	PF02171	remanei	Piwi domain	GO:nucleic acid binding ; GO:0003676
10	PF02171	orang	Piwi domain	GO:nucleic acid binding ; GO:0003676
21	PF02171	japonica	Piwi domain	GO:nucleic acid binding ; GO:0003676
30	PF02171	human	Piwi domain	GO:nucleic acid binding ; GO:0003676
11	PF02171	gorilla	Piwi domain	GO:nucleic acid binding ; GO:0003676
36	PF02171	elegans	Piwi domain	GO:nucleic acid binding ; GO:0003676
20	PF02171	chimp	Piwi domain	GO:nucleic acid binding ; GO:0003676
26	PF02171	briggsae	Piwi domain	GO:nucleic acid binding ; GO:0003676
69	PF02171	brenneri	Piwi domain	GO:nucleic acid binding ; GO:0003676
13	PF02171	bonobo	Piwi domain	GO:nucleic acid binding ; GO:0003676
45	PF02171	angaria	Piwi domain	GO:nucleic acid binding ; GO:0003676
12	PF02171	Dsimulans	Piwi domain	GO:nucleic acid binding ; GO:0003676
20	PF02171	Dpseudo	Piwi domain	GO:nucleic acid binding ; GO:0003676
10	PF02171	Dmelano	Piwi domain	GO:nucleic acid binding ; GO:0003676
8	PF02171	Derecta	Piwi domain	GO:nucleic acid binding ; GO:0003676
30	PF02170	remanei	PAZ domain	GO:protein binding ; GO:0005515
11	PF02170	orang	PAZ domain	GO:protein binding ; GO:0005515
17	PF02170	japonica	PAZ domain	GO:protein binding ; GO:0005515
34	PF02170	human	PAZ domain	GO:protein binding ; GO:0005515
11	PF02170	gorilla	PAZ domain	GO:protein binding ; GO:0005515
31	PF02170	elegans	PAZ domain	GO:protein binding ; GO:0005515
22	PF02170	chimp	PAZ domain	GO:protein binding ; GO:0005515
19	PF02170	briggsae	PAZ domain	GO:protein binding ; GO:0005515
36	PF02170	brenneri	PAZ domain	GO:protein binding ; GO:0005515
16	PF02170	bonobo	PAZ domain	GO:protein binding ; GO:0005515
16	PF02170	angaria	PAZ domain	GO:protein binding ; GO:0005515
14	PF02170	Dsimulans	PAZ domain	GO:protein binding ; GO:0005515
22	PF02170	Dpseudo	PAZ domain	GO:protein binding ; GO:0005515
13	PF02170	Dmelano	PAZ domain	GO:protein binding ; GO:0005515
10	PF02170	Derecta	PAZ domain	GO:protein binding ; GO:0005515
39	PF02158	human	Neuregulin family
7	PF02158	gorilla	Neuregulin family
21	PF02158	chimp	Neuregulin family
10	PF02158	bonobo	Neuregulin family
3	PF02155	orang	Glucocorticoid receptor	GO:DNA binding ; GO:0003677 GO:glucocorticoid receptor activity ; GO:0004883 GO:steroid binding ; GO:0005496 GO:regulation of transcription
12	PF02155	human	Glucocorticoid receptor	GO:DNA binding ; GO:0003677 GO:glucocorticoid receptor activity ; GO:0004883 GO:steroid binding ; GO:0005496 GO:regulation of transcription
2	PF02155	chimp	Glucocorticoid receptor	GO:DNA binding ; GO:0003677 GO:glucocorticoid receptor activity ; GO:0004883 GO:steroid binding ; GO:0005496 GO:regulation of transcription
2	PF02155	bonobo	Glucocorticoid receptor	GO:DNA binding ; GO:0003677 GO:glucocorticoid receptor activity ; GO:0004883 GO:steroid binding ; GO:0005496 GO:regulation of transcription
5	PF02138	remanei	Beige/BEACH domain
9	PF02138	orang	Beige/BEACH domain
8	PF02138	japonica	Beige/BEACH domain
57	PF02138	human	Beige/BEACH domain
10	PF02138	gorilla	Beige/BEACH domain
7	PF02138	elegans	Beige/BEACH domain
21	PF02138	chimp	Beige/BEACH domain
4	PF02138	briggsae	Beige/BEACH domain
2	PF02138	brenneri	Beige/BEACH domain
21	PF02138	bonobo	Beige/BEACH domain
9	PF02138	angaria	Beige/BEACH domain
6	PF02138	Dsimulans	Beige/BEACH domain
20	PF02138	Dpseudo	Beige/BEACH domain
13	PF02138	Dmelano	Beige/BEACH domain
13	PF02138	Derecta	Beige/BEACH domain
5	PF02026	orang	RyR domain
19	PF02026	human	RyR domain
6	PF02026	gorilla	RyR domain
4	PF02026	elegans	RyR domain
18	PF02026	chimp	RyR domain
2	PF02026	brenneri	RyR domain
3	PF02026	bonobo	RyR domain
4	PF02026	angaria	RyR domain
16	PF02026	Dpseudo	RyR domain
10	PF02026	Dmelano	RyR domain
22	PF02026	Derecta	RyR domain
2	PF01974	remanei	tRNA intron endonuclease	GO:tRNA-intron endonuclease activity ; GO:0000213 GO:tRNA splicing
4	PF01974	orang	tRNA intron endonuclease	GO:tRNA-intron endonuclease activity ; GO:0000213 GO:tRNA splicing
11	PF01974	human	tRNA intron endonuclease	GO:tRNA-intron endonuclease activity ; GO:0000213 GO:tRNA splicing
2	PF01974	elegans	tRNA intron endonuclease	GO:tRNA-intron endonuclease activity ; GO:0000213 GO:tRNA splicing
7	PF01974	chimp	tRNA intron endonuclease	GO:tRNA-intron endonuclease activity ; GO:0000213 GO:tRNA splicing
2	PF01974	briggsae	tRNA intron endonuclease	GO:tRNA-intron endonuclease activity ; GO:0000213 GO:tRNA splicing
4	PF01974	bonobo	tRNA intron endonuclease	GO:tRNA-intron endonuclease activity ; GO:0000213 GO:tRNA splicing
2	PF01974	angaria	tRNA intron endonuclease	GO:tRNA-intron endonuclease activity ; GO:0000213 GO:tRNA splicing
2	PF01974	Dsimulans	tRNA intron endonuclease	GO:tRNA-intron endonuclease activity ; GO:0000213 GO:tRNA splicing
2	PF01974	Dpseudo	tRNA intron endonuclease	GO:tRNA-intron endonuclease activity ; GO:0000213 GO:tRNA splicing
2	PF01974	Dmelano	tRNA intron endonuclease	GO:tRNA-intron endonuclease activity ; GO:0000213 GO:tRNA splicing
2	PF01974	Derecta	tRNA intron endonuclease	GO:tRNA-intron endonuclease activity ; GO:0000213 GO:tRNA splicing
14	PF01936	human	NYN domain
7	PF01936	chimp	NYN domain
8	PF01936	bonobo	NYN domain
2	PF01846	remanei	FF domain
13	PF01846	orang	FF domain
2	PF01846	japonica	FF domain
38	PF01846	human	FF domain
7	PF01846	gorilla	FF domain
7	PF01846	elegans	FF domain
21	PF01846	chimp	FF domain
2	PF01846	briggsae	FF domain
3	PF01846	brenneri	FF domain
11	PF01846	bonobo	FF domain
5	PF01846	Dsimulans	FF domain
9	PF01846	Dpseudo	FF domain
6	PF01846	Dmelano	FF domain
6	PF01846	Derecta	FF domain
5	PF01827	japonica	FTH domain
10	PF01803	orang	LIM-domain binding protein
20	PF01803	human	LIM-domain binding protein
3	PF01803	gorilla	LIM-domain binding protein
3	PF01803	elegans	LIM-domain binding protein
2	PF01803	chimp	LIM-domain binding protein
10	PF01803	bonobo	LIM-domain binding protein
2	PF01803	Dsimulans	LIM-domain binding protein
2	PF01803	Dmelano	LIM-domain binding protein
11	PF01762	remanei	Galactosyltransferase	GO:galactosyltransferase activity ; GO:0008378 GO:protein glycosylation ; GO:0006486 GO:membrane ; GO:0016020
16	PF01762	orang	Galactosyltransferase	GO:galactosyltransferase activity ; GO:0008378 GO:protein glycosylation ; GO:0006486 GO:membrane ; GO:0016020
8	PF01762	japonica	Galactosyltransferase	GO:galactosyltransferase activity ; GO:0008378 GO:protein glycosylation ; GO:0006486 GO:membrane ; GO:0016020
20	PF01762	human	Galactosyltransferase	GO:galactosyltransferase activity ; GO:0008378 GO:protein glycosylation ; GO:0006486 GO:membrane ; GO:0016020
17	PF01762	gorilla	Galactosyltransferase	GO:galactosyltransferase activity ; GO:0008378 GO:protein glycosylation ; GO:0006486 GO:membrane ; GO:0016020
22	PF01762	elegans	Galactosyltransferase	GO:galactosyltransferase activity ; GO:0008378 GO:protein glycosylation ; GO:0006486 GO:membrane ; GO:0016020
16	PF01762	chimp	Galactosyltransferase	GO:galactosyltransferase activity ; GO:0008378 GO:protein glycosylation ; GO:0006486 GO:membrane ; GO:0016020
8	PF01762	briggsae	Galactosyltransferase	GO:galactosyltransferase activity ; GO:0008378 GO:protein glycosylation ; GO:0006486 GO:membrane ; GO:0016020
11	PF01762	brenneri	Galactosyltransferase	GO:galactosyltransferase activity ; GO:0008378 GO:protein glycosylation ; GO:0006486 GO:membrane ; GO:0016020
15	PF01762	bonobo	Galactosyltransferase	GO:galactosyltransferase activity ; GO:0008378 GO:protein glycosylation ; GO:0006486 GO:membrane ; GO:0016020
2	PF01762	angaria	Galactosyltransferase	GO:galactosyltransferase activity ; GO:0008378 GO:protein glycosylation ; GO:0006486 GO:membrane ; GO:0016020
13	PF01762	Dsimulans	Galactosyltransferase	GO:galactosyltransferase activity ; GO:0008378 GO:protein glycosylation ; GO:0006486 GO:membrane ; GO:0016020
20	PF01762	Dpseudo	Galactosyltransferase	GO:galactosyltransferase activity ; GO:0008378 GO:protein glycosylation ; GO:0006486 GO:membrane ; GO:0016020
12	PF01762	Dmelano	Galactosyltransferase	GO:galactosyltransferase activity ; GO:0008378 GO:protein glycosylation ; GO:0006486 GO:membrane ; GO:0016020
9	PF01762	Derecta	Galactosyltransferase	GO:galactosyltransferase activity ; GO:0008378 GO:protein glycosylation ; GO:0006486 GO:membrane ; GO:0016020
2	PF01603	remanei	Protein phosphatase 2A regulatory B subunit (B56 family)	GO:protein phosphatase type 2A regulator activity ; GO:0008601 GO:signal transduction ; GO:0007165 GO:protein phosphatase type 2A complex ; GO:0000159
5	PF01603	orang	Protein phosphatase 2A regulatory B subunit (B56 family)	GO:protein phosphatase type 2A regulator activity ; GO:0008601 GO:signal transduction ; GO:0007165 GO:protein phosphatase type 2A complex ; GO:0000159
30	PF01603	japonica	Protein phosphatase 2A regulatory B subunit (B56 family)	GO:protein phosphatase type 2A regulator activity ; GO:0008601 GO:signal transduction ; GO:0007165 GO:protein phosphatase type 2A complex ; GO:0000159
29	PF01603	human	Protein phosphatase 2A regulatory B subunit (B56 family)	GO:protein phosphatase type 2A regulator activity ; GO:0008601 GO:signal transduction ; GO:0007165 GO:protein phosphatase type 2A complex ; GO:0000159
7	PF01603	gorilla	Protein phosphatase 2A regulatory B subunit (B56 family)	GO:protein phosphatase type 2A regulator activity ; GO:0008601 GO:signal transduction ; GO:0007165 GO:protein phosphatase type 2A complex ; GO:0000159
5	PF01603	elegans	Protein phosphatase 2A regulatory B subunit (B56 family)	GO:protein phosphatase type 2A regulator activity ; GO:0008601 GO:signal transduction ; GO:0007165 GO:protein phosphatase type 2A complex ; GO:0000159
8	PF01603	chimp	Protein phosphatase 2A regulatory B subunit (B56 family)	GO:protein phosphatase type 2A regulator activity ; GO:0008601 GO:signal transduction ; GO:0007165 GO:protein phosphatase type 2A complex ; GO:0000159
2	PF01603	briggsae	Protein phosphatase 2A regulatory B subunit (B56 family)	GO:protein phosphatase type 2A regulator activity ; GO:0008601 GO:signal transduction ; GO:0007165 GO:protein phosphatase type 2A complex ; GO:0000159
3	PF01603	brenneri	Protein phosphatase 2A regulatory B subunit (B56 family)	GO:protein phosphatase type 2A regulator activity ; GO:0008601 GO:signal transduction ; GO:0007165 GO:protein phosphatase type 2A complex ; GO:0000159
12	PF01603	bonobo	Protein phosphatase 2A regulatory B subunit (B56 family)	GO:protein phosphatase type 2A regulator activity ; GO:0008601 GO:signal transduction ; GO:0007165 GO:protein phosphatase type 2A complex ; GO:0000159
3	PF01603	angaria	Protein phosphatase 2A regulatory B subunit (B56 family)	GO:protein phosphatase type 2A regulator activity ; GO:0008601 GO:signal transduction ; GO:0007165 GO:protein phosphatase type 2A complex ; GO:0000159
6	PF01603	Dsimulans	Protein phosphatase 2A regulatory B subunit (B56 family)	GO:protein phosphatase type 2A regulator activity ; GO:0008601 GO:signal transduction ; GO:0007165 GO:protein phosphatase type 2A complex ; GO:0000159
6	PF01603	Dpseudo	Protein phosphatase 2A regulatory B subunit (B56 family)	GO:protein phosphatase type 2A regulator activity ; GO:0008601 GO:signal transduction ; GO:0007165 GO:protein phosphatase type 2A complex ; GO:0000159
11	PF01603	Dmelano	Protein phosphatase 2A regulatory B subunit (B56 family)	GO:protein phosphatase type 2A regulator activity ; GO:0008601 GO:signal transduction ; GO:0007165 GO:protein phosphatase type 2A complex ; GO:0000159
8	PF01603	Derecta	Protein phosphatase 2A regulatory B subunit (B56 family)	GO:protein phosphatase type 2A regulator activity ; GO:0008601 GO:signal transduction ; GO:0007165 GO:protein phosphatase type 2A complex ; GO:0000159
9	PF01576	remanei	Myosin tail	GO:motor activity ; GO:0003774 GO:myosin complex ; GO:0016459
28	PF01576	orang	Myosin tail	GO:motor activity ; GO:0003774 GO:myosin complex ; GO:0016459
10	PF01576	japonica	Myosin tail	GO:motor activity ; GO:0003774 GO:myosin complex ; GO:0016459
50	PF01576	human	Myosin tail	GO:motor activity ; GO:0003774 GO:myosin complex ; GO:0016459
22	PF01576	gorilla	Myosin tail	GO:motor activity ; GO:0003774 GO:myosin complex ; GO:0016459
9	PF01576	elegans	Myosin tail	GO:motor activity ; GO:0003774 GO:myosin complex ; GO:0016459
31	PF01576	chimp	Myosin tail	GO:motor activity ; GO:0003774 GO:myosin complex ; GO:0016459
8	PF01576	briggsae	Myosin tail	GO:motor activity ; GO:0003774 GO:myosin complex ; GO:0016459
13	PF01576	brenneri	Myosin tail	GO:motor activity ; GO:0003774 GO:myosin complex ; GO:0016459
34	PF01576	bonobo	Myosin tail	GO:motor activity ; GO:0003774 GO:myosin complex ; GO:0016459
34	PF01576	angaria	Myosin tail	GO:motor activity ; GO:0003774 GO:myosin complex ; GO:0016459
46	PF01576	Dsimulans	Myosin tail	GO:motor activity ; GO:0003774 GO:myosin complex ; GO:0016459
51	PF01576	Dpseudo	Myosin tail	GO:motor activity ; GO:0003774 GO:myosin complex ; GO:0016459
39	PF01576	Dmelano	Myosin tail	GO:motor activity ; GO:0003774 GO:myosin complex ; GO:0016459
51	PF01576	Derecta	Myosin tail	GO:motor activity ; GO:0003774 GO:myosin complex ; GO:0016459
18	PF01531	remanei	Glycosyl transferase family 11	GO:galactoside 2-alpha-L-fucosyltransferase activity ; GO:0008107 GO:carbohydrate metabolic process ; GO:0005975 GO:membrane ; GO:0016020
3	PF01531	orang	Glycosyl transferase family 11	GO:galactoside 2-alpha-L-fucosyltransferase activity ; GO:0008107 GO:carbohydrate metabolic process ; GO:0005975 GO:membrane ; GO:0016020
4	PF01531	japonica	Glycosyl transferase family 11	GO:galactoside 2-alpha-L-fucosyltransferase activity ; GO:0008107 GO:carbohydrate metabolic process ; GO:0005975 GO:membrane ; GO:0016020
3	PF01531	human	Glycosyl transferase family 11	GO:galactoside 2-alpha-L-fucosyltransferase activity ; GO:0008107 GO:carbohydrate metabolic process ; GO:0005975 GO:membrane ; GO:0016020
2	PF01531	gorilla	Glycosyl transferase family 11	GO:galactoside 2-alpha-L-fucosyltransferase activity ; GO:0008107 GO:carbohydrate metabolic process ; GO:0005975 GO:membrane ; GO:0016020
25	PF01531	elegans	Glycosyl transferase family 11	GO:galactoside 2-alpha-L-fucosyltransferase activity ; GO:0008107 GO:carbohydrate metabolic process ; GO:0005975 GO:membrane ; GO:0016020
6	PF01531	chimp	Glycosyl transferase family 11	GO:galactoside 2-alpha-L-fucosyltransferase activity ; GO:0008107 GO:carbohydrate metabolic process ; GO:0005975 GO:membrane ; GO:0016020
5	PF01531	briggsae	Glycosyl transferase family 11	GO:galactoside 2-alpha-L-fucosyltransferase activity ; GO:0008107 GO:carbohydrate metabolic process ; GO:0005975 GO:membrane ; GO:0016020
13	PF01531	brenneri	Glycosyl transferase family 11	GO:galactoside 2-alpha-L-fucosyltransferase activity ; GO:0008107 GO:carbohydrate metabolic process ; GO:0005975 GO:membrane ; GO:0016020
4	PF01531	bonobo	Glycosyl transferase family 11	GO:galactoside 2-alpha-L-fucosyltransferase activity ; GO:0008107 GO:carbohydrate metabolic process ; GO:0005975 GO:membrane ; GO:0016020
3	PF01531	angaria	Glycosyl transferase family 11	GO:galactoside 2-alpha-L-fucosyltransferase activity ; GO:0008107 GO:carbohydrate metabolic process ; GO:0005975 GO:membrane ; GO:0016020
2	PF01530	remanei	Zinc finger	GO:transcription factor activity
6	PF01530	orang	Zinc finger	GO:transcription factor activity
35	PF01530	human	Zinc finger	GO:transcription factor activity
10	PF01530	gorilla	Zinc finger	GO:transcription factor activity
2	PF01530	elegans	Zinc finger	GO:transcription factor activity
32	PF01530	chimp	Zinc finger	GO:transcription factor activity
3	PF01530	brenneri	Zinc finger	GO:transcription factor activity
14	PF01530	bonobo	Zinc finger	GO:transcription factor activity
2	PF01530	Dsimulans	Zinc finger	GO:transcription factor activity
11	PF01530	Dpseudo	Zinc finger	GO:transcription factor activity
8	PF01530	Dmelano	Zinc finger	GO:transcription factor activity
3	PF01530	Derecta	Zinc finger	GO:transcription factor activity
14	PF01498	remanei	Transposase	GO:DNA binding ; GO:0003677 GO:transposition
5	PF01498	briggsae	Transposase	GO:DNA binding ; GO:0003677 GO:transposition
2	PF01498	brenneri	Transposase	GO:DNA binding ; GO:0003677 GO:transposition
3	PF01498	angaria	Transposase	GO:DNA binding ; GO:0003677 GO:transposition
21	PF01497	angaria	Periplasmic binding protein	GO:binding ; GO:0005488
4	PF01480	remanei	PWI domain	GO:mRNA processing ; GO:0006397
7	PF01480	orang	PWI domain	GO:mRNA processing ; GO:0006397
4	PF01480	japonica	PWI domain	GO:mRNA processing ; GO:0006397
43	PF01480	human	PWI domain	GO:mRNA processing ; GO:0006397
4	PF01480	gorilla	PWI domain	GO:mRNA processing ; GO:0006397
6	PF01480	elegans	PWI domain	GO:mRNA processing ; GO:0006397
18	PF01480	chimp	PWI domain	GO:mRNA processing ; GO:0006397
4	PF01480	briggsae	PWI domain	GO:mRNA processing ; GO:0006397
6	PF01480	brenneri	PWI domain	GO:mRNA processing ; GO:0006397
15	PF01480	bonobo	PWI domain	GO:mRNA processing ; GO:0006397
2	PF01480	angaria	PWI domain	GO:mRNA processing ; GO:0006397
4	PF01480	Dsimulans	PWI domain	GO:mRNA processing ; GO:0006397
3	PF01480	Dpseudo	PWI domain	GO:mRNA processing ; GO:0006397
4	PF01480	Dmelano	PWI domain	GO:mRNA processing ; GO:0006397
4	PF01480	Derecta	PWI domain	GO:mRNA processing ; GO:0006397
36	PF01466	remanei	Skp1 family	GO:ubiquitin-dependent protein catabolic process ; GO:0006511
3	PF01466	japonica	Skp1 family	GO:ubiquitin-dependent protein catabolic process ; GO:0006511
2	PF01466	human	Skp1 family	GO:ubiquitin-dependent protein catabolic process ; GO:0006511
4	PF01466	gorilla	Skp1 family	GO:ubiquitin-dependent protein catabolic process ; GO:0006511
20	PF01466	elegans	Skp1 family	GO:ubiquitin-dependent protein catabolic process ; GO:0006511
2	PF01466	chimp	Skp1 family	GO:ubiquitin-dependent protein catabolic process ; GO:0006511
21	PF01466	briggsae	Skp1 family	GO:ubiquitin-dependent protein catabolic process ; GO:0006511
55	PF01466	brenneri	Skp1 family	GO:ubiquitin-dependent protein catabolic process ; GO:0006511
3	PF01466	angaria	Skp1 family	GO:ubiquitin-dependent protein catabolic process ; GO:0006511
6	PF01466	Dsimulans	Skp1 family	GO:ubiquitin-dependent protein catabolic process ; GO:0006511
21	PF01466	Dpseudo	Skp1 family	GO:ubiquitin-dependent protein catabolic process ; GO:0006511
8	PF01466	Dmelano	Skp1 family	GO:ubiquitin-dependent protein catabolic process ; GO:0006511
6	PF01466	Derecta	Skp1 family	GO:ubiquitin-dependent protein catabolic process ; GO:0006511
16	PF01463	orang	Leucine rich repeat C-terminal domain
24	PF01463	human	Leucine rich repeat C-terminal domain
16	PF01463	gorilla	Leucine rich repeat C-terminal domain
19	PF01463	chimp	Leucine rich repeat C-terminal domain
13	PF01463	bonobo	Leucine rich repeat C-terminal domain
4	PF01463	angaria	Leucine rich repeat C-terminal domain
2	PF01463	Dpseudo	Leucine rich repeat C-terminal domain
4	PF01463	Dmelano	Leucine rich repeat C-terminal domain
2	PF01462	remanei	Leucine rich repeat N-terminal domain
40	PF01462	orang	Leucine rich repeat N-terminal domain
63	PF01462	human	Leucine rich repeat N-terminal domain
26	PF01462	gorilla	Leucine rich repeat N-terminal domain
2	PF01462	elegans	Leucine rich repeat N-terminal domain
35	PF01462	chimp	Leucine rich repeat N-terminal domain
2	PF01462	briggsae	Leucine rich repeat N-terminal domain
3	PF01462	brenneri	Leucine rich repeat N-terminal domain
36	PF01462	bonobo	Leucine rich repeat N-terminal domain
3	PF01462	angaria	Leucine rich repeat N-terminal domain
2	PF01462	Dsimulans	Leucine rich repeat N-terminal domain
2	PF01462	Dpseudo	Leucine rich repeat N-terminal domain
6	PF01462	Dmelano	Leucine rich repeat N-terminal domain
2	PF01462	Derecta	Leucine rich repeat N-terminal domain
2	PF01442	remanei	Apolipoprotein A1/A4/E domain	GO:lipid binding ; GO:0008289 GO:lipid transport ; GO:0006869 GO:lipoprotein metabolic process ; GO:0042157 GO:extracellular region ; GO:0005576
4	PF01442	orang	Apolipoprotein A1/A4/E domain	GO:lipid binding ; GO:0008289 GO:lipid transport ; GO:0006869 GO:lipoprotein metabolic process ; GO:0042157 GO:extracellular region ; GO:0005576
3	PF01442	japonica	Apolipoprotein A1/A4/E domain	GO:lipid binding ; GO:0008289 GO:lipid transport ; GO:0006869 GO:lipoprotein metabolic process ; GO:0042157 GO:extracellular region ; GO:0005576
5	PF01442	human	Apolipoprotein A1/A4/E domain	GO:lipid binding ; GO:0008289 GO:lipid transport ; GO:0006869 GO:lipoprotein metabolic process ; GO:0042157 GO:extracellular region ; GO:0005576
4	PF01442	gorilla	Apolipoprotein A1/A4/E domain	GO:lipid binding ; GO:0008289 GO:lipid transport ; GO:0006869 GO:lipoprotein metabolic process ; GO:0042157 GO:extracellular region ; GO:0005576
12	PF01442	elegans	Apolipoprotein A1/A4/E domain	GO:lipid binding ; GO:0008289 GO:lipid transport ; GO:0006869 GO:lipoprotein metabolic process ; GO:0042157 GO:extracellular region ; GO:0005576
4	PF01442	chimp	Apolipoprotein A1/A4/E domain	GO:lipid binding ; GO:0008289 GO:lipid transport ; GO:0006869 GO:lipoprotein metabolic process ; GO:0042157 GO:extracellular region ; GO:0005576
4	PF01442	brenneri	Apolipoprotein A1/A4/E domain	GO:lipid binding ; GO:0008289 GO:lipid transport ; GO:0006869 GO:lipoprotein metabolic process ; GO:0042157 GO:extracellular region ; GO:0005576
4	PF01442	bonobo	Apolipoprotein A1/A4/E domain	GO:lipid binding ; GO:0008289 GO:lipid transport ; GO:0006869 GO:lipoprotein metabolic process ; GO:0042157 GO:extracellular region ; GO:0005576
6	PF01394	orang	Clathrin propeller repeat
2	PF01394	japonica	Clathrin propeller repeat
17	PF01394	human	Clathrin propeller repeat
3	PF01394	gorilla	Clathrin propeller repeat
14	PF01394	chimp	Clathrin propeller repeat
3	PF01394	bonobo	Clathrin propeller repeat
4	PF01394	angaria	Clathrin propeller repeat
27	PF01359	remanei	Transposase (partial DDE domain)
3	PF01359	orang	Transposase (partial DDE domain)
91	PF01359	japonica	Transposase (partial DDE domain)
6	PF01359	human	Transposase (partial DDE domain)
2	PF01359	gorilla	Transposase (partial DDE domain)
2	PF01359	chimp	Transposase (partial DDE domain)
2	PF01359	briggsae	Transposase (partial DDE domain)
5	PF01359	brenneri	Transposase (partial DDE domain)
2	PF01359	bonobo	Transposase (partial DDE domain)
3	PF01359	Derecta	Transposase (partial DDE domain)
14	PF01344	remanei	Kelch motif	GO:protein binding ; GO:0005515
93	PF01344	orang	Kelch motif	GO:protein binding ; GO:0005515
13	PF01344	japonica	Kelch motif	GO:protein binding ; GO:0005515
77	PF01344	gorilla	Kelch motif	GO:protein binding ; GO:0005515
19	PF01344	elegans	Kelch motif	GO:protein binding ; GO:0005515
12	PF01344	briggsae	Kelch motif	GO:protein binding ; GO:0005515
15	PF01344	brenneri	Kelch motif	GO:protein binding ; GO:0005515
10	PF01344	angaria	Kelch motif	GO:protein binding ; GO:0005515
22	PF01344	Dsimulans	Kelch motif	GO:protein binding ; GO:0005515
[truncated: 935 more rows]

## Sheet: counts 100-150
Counts	PfamID	Organism	Pfam functions	GO-terms
147	PF13927	orang	Immunoglobulin domain
120	PF13927	gorilla	Immunoglobulin domain
117	PF13927	Dmelano	Immunoglobulin domain
146	PF13650	japonica	Aspartyl protease
139	PF12937	human	F-box-like	GO:protein binding ; GO:0005515
123	PF10328	remanei	Serpentine type 7TM GPCR chemoreceptor Srx
113	PF10328	elegans	Serpentine type 7TM GPCR chemoreceptor Srx
105	PF10328	briggsae	Serpentine type 7TM GPCR chemoreceptor Srx
105	PF10326	japonica	Serpentine type 7TM GPCR chemoreceptor Str
115	PF10326	angaria	Serpentine type 7TM GPCR chemoreceptor Str
117	PF10325	remanei	Serpentine type 7TM GPCR chemoreceptor Srz
126	PF10324	briggsae	Serpentine type 7TM GPCR chemoreceptor Srw
138	PF10324	brenneri	Serpentine type 7TM GPCR chemoreceptor Srw
102	PF10322	remanei	Serpentine type 7TM GPCR chemoreceptor Sru
127	PF09379	chimp	FERM N-terminal domain
111	PF09379	bonobo	FERM N-terminal domain
127	PF05970	japonica	PIF1-like helicase	GO:DNA helicase activity ; GO:0003678 GO:telomere maintenance ; GO:0000723 GO:DNA repair ; GO:0006281
118	PF04435	brenneri	Domain of unknown function (DUF545)
123	PF02214	human	BTB/POZ domain	GO:protein homooligomerization ; GO:0051260
114	PF02206	remanei	Domain of unknown function
117	PF01827	briggsae	FTH domain
114	PF01344	chimp	Kelch motif	GO:protein binding ; GO:0005515
106	PF01344	bonobo	Kelch motif	GO:protein binding ; GO:0005515
112	PF00917	elegans	MATH domain	GO:protein binding ; GO:0005515
107	PF00791	human	ZU5 domain
113	PF00651	elegans	BTB/POZ domain	GO:protein binding ; GO:0005515
120	PF00651	briggsae	BTB/POZ domain	GO:protein binding ; GO:0005515
106	PF00651	angaria	BTB/POZ domain	GO:protein binding ; GO:0005515
137	PF00651	Dsimulans	BTB/POZ domain	GO:protein binding ; GO:0005515
125	PF00651	Derecta	BTB/POZ domain	GO:protein binding ; GO:0005515
119	PF00646	briggsae	F-box domain	GO:protein binding ; GO:0005515
134	PF00635	japonica	MSP (Major sperm protein) domain
130	PF00622	orang	SPRY domain	GO:protein binding ; GO:0005515
121	PF00622	bonobo	SPRY domain	GO:protein binding ; GO:0005515
122	PF00250	human	Fork head domain	GO:transcription factor activity
100	PF00071	Dpseudo	Ras family	GO:GTP binding ; GO:0005525 GO:small GTPase mediated signal transduction ; GO:0007264
103	PF00071	Dmelano	Ras family	GO:GTP binding ; GO:0005525 GO:small GTPase mediated signal transduction ; GO:0007264
118	PF00067	orang	Cytochrome P450	GO:iron ion binding ; GO:0005506 GO:oxidoreductase activity
122	PF00067	chimp	Cytochrome P450	GO:iron ion binding ; GO:0005506 GO:oxidoreductase activity
100	PF00067	Dpseudo	Cytochrome P450	GO:iron ion binding ; GO:0005506 GO:oxidoreductase activity
146	PF00059	orang	Lectin C-type domain
130	PF00059	gorilla	Lectin C-type domain
111	PF00059	briggsae	Lectin C-type domain
139	PF00059	bonobo	Lectin C-type domain
120	PF00059	angaria	Lectin C-type domain
148	PF00046	remanei	Homeobox domain	GO:DNA binding ; GO:0003677
108	PF00046	japonica	Homeobox domain	GO:DNA binding ; GO:0003677
128	PF00046	elegans	Homeobox domain	GO:DNA binding ; GO:0003677
123	PF00046	briggsae	Homeobox domain	GO:DNA binding ; GO:0003677
134	PF00046	brenneri	Homeobox domain	GO:DNA binding ; GO:0003677
141	PF00046	Dsimulans	Homeobox domain	GO:DNA binding ; GO:0003677
122	PF00046	Dpseudo	Homeobox domain	GO:DNA binding ; GO:0003677
127	PF00046	Derecta	Homeobox domain	GO:DNA binding ; GO:0003677
112	PF00041	angaria	Fibronectin type III domain	GO:protein binding ; GO:0005515
133	PF00041	Dpseudo	Fibronectin type III domain	GO:protein binding ; GO:0005515
115	PF00041	Derecta	Fibronectin type III domain	GO:protein binding ; GO:0005515
130	PF00010	gorilla	Helix-loop-helix DNA-binding domain	GO:protein dimerization activity ; GO:0046983
147	PF00002	bonobo	7 transmembrane receptor (Secretin family)	GO:G-protein coupled receptor activity ; GO:0004930 GO:G-protein coupled receptor signaling pathway ; GO:0007186 GO:integral component of membrane ; GO:0016021
132	PF00001	remanei	7 transmembrane receptor (rhodopsin family)	GO:G-protein coupled receptor activity ; GO:0004930 GO:G-protein coupled receptor signaling pathway ; GO:0007186 GO:integral component of membrane ; GO:0016021
126	PF00001	briggsae	7 transmembrane receptor (rhodopsin family)	GO:G-protein coupled receptor activity ; GO:0004930 GO:G-protein coupled receptor signaling pathway ; GO:0007186 GO:integral component of membrane ; GO:0016021
135	PF00001	brenneri	7 transmembrane receptor (rhodopsin family)	GO:G-protein coupled receptor activity ; GO:0004930 GO:G-protein coupled receptor signaling pathway ; GO:0007186 GO:integral component of membrane ; GO:0016021
124	PF00001	angaria	7 transmembrane receptor (rhodopsin family)	GO:G-protein coupled receptor activity ; GO:0004930 GO:G-protein coupled receptor signaling pathway ; GO:0007186 GO:integral component of membrane ; GO:0016021
105	PF00001	Dsimulans	7 transmembrane receptor (rhodopsin family)	GO:G-protein coupled receptor activity ; GO:0004930 GO:G-protein coupled receptor signaling pathway ; GO:0007186 GO:integral component of membrane ; GO:0016021
109	PF00001	Dpseudo	7 transmembrane receptor (rhodopsin family)	GO:G-protein coupled receptor activity ; GO:0004930 GO:G-protein coupled receptor signaling pathway ; GO:0007186 GO:integral component of membrane ; GO:0016021
128	PF00001	Dmelano	7 transmembrane receptor (rhodopsin family)	GO:G-protein coupled receptor activity ; GO:0004930 GO:G-protein coupled receptor signaling pathway ; GO:0007186 GO:integral component of membrane ; GO:0016021

## Sheet: 150-200
Counts	PfamID	Organism	Pfam functions	GO-terms
198	PF13927	bonobo	Immunoglobulin domain
173	PF10324	remanei	Serpentine type 7TM GPCR chemoreceptor Srw
162	PF10324	elegans	Serpentine type 7TM GPCR chemoreceptor Srw
159	PF10318	briggsae	Serpentine type 7TM GPCR chemoreceptor Srh
180	PF10318	brenneri	Serpentine type 7TM GPCR chemoreceptor Srh
177	PF07735	elegans	F-box associated
158	PF07707	human	BTB And C-terminal Kelch
159	PF03372	japonica	Endonuclease/Exonuclease/phosphatase family
171	PF01344	human	Kelch motif	GO:protein binding ; GO:0005515
165	PF00665	remanei	Integrase core domain	GO:DNA integration ; GO:0015074
172	PF00665	japonica	Integrase core domain	GO:DNA integration ; GO:0015074
184	PF00651	orang	BTB/POZ domain	GO:protein binding ; GO:0005515
153	PF00651	gorilla	BTB/POZ domain	GO:protein binding ; GO:0005515
153	PF00651	Dpseudo	BTB/POZ domain	GO:protein binding ; GO:0005515
195	PF00651	Dmelano	BTB/POZ domain	GO:protein binding ; GO:0005515
196	PF00622	chimp	SPRY domain	GO:protein binding ; GO:0005515
152	PF00569	human	Zinc finger	GO:zinc ion binding ; GO:0008270
156	PF00514	human	Armadillo/beta-catenin-like repeat	GO:protein binding ; GO:0005515
181	PF00071	orang	Ras family	GO:GTP binding ; GO:0005525 GO:small GTPase mediated signal transduction ; GO:0007264
189	PF00071	gorilla	Ras family	GO:GTP binding ; GO:0005525 GO:small GTPase mediated signal transduction ; GO:0007264
177	PF00067	human	Cytochrome P450	GO:iron ion binding ; GO:0005506 GO:oxidoreductase activity
158	PF00059	remanei	Lectin C-type domain
196	PF00059	elegans	Lectin C-type domain
178	PF00059	chimp	Lectin C-type domain
159	PF00059	brenneri	Lectin C-type domain
189	PF00046	Dmelano	Homeobox domain	GO:DNA binding ; GO:0003677
199	PF00041	gorilla	Fibronectin type III domain	GO:protein binding ; GO:0005515
153	PF00041	Dsimulans	Fibronectin type III domain	GO:protein binding ; GO:0005515
155	PF00010	orang	Helix-loop-helix DNA-binding domain	GO:protein dimerization activity ; GO:0046983
186	PF00010	chimp	Helix-loop-helix DNA-binding domain	GO:protein dimerization activity ; GO:0046983
178	PF00010	bonobo	Helix-loop-helix DNA-binding domain	GO:protein dimerization activity ; GO:0046983
184	PF00004	human	ATPase family associated with various cellular activities (AAA)	GO:ATP binding ; GO:0005524
165	PF00002	chimp	7 transmembrane receptor (Secretin family)	GO:G-protein coupled receptor activity ; GO:0004930 GO:G-protein coupled receptor signaling pathway ; GO:0007186 GO:integral component of membrane ; GO:0016021
171	PF00001	japonica	7 transmembrane receptor (rhodopsin family)	GO:G-protein coupled receptor activity ; GO:0004930 GO:G-protein coupled receptor signaling pathway ; GO:0007186 GO:integral component of membrane ; GO:0016021

## Sheet: 200-400
Counts	PfamID	Organism	Pfam functions	GO-terms
281	PF13927	chimp	Immunoglobulin domain
320	PF13358	japonica	DDE superfamily endonuclease
355	PF12078	remanei	Domain of unknown function (DUF3557)
208	PF11427	japonica	Tc3 transposase	GO:DNA binding ; GO:0003677
327	PF10326	remanei	Serpentine type 7TM GPCR chemoreceptor Str
240	PF10326	elegans	Serpentine type 7TM GPCR chemoreceptor Str
215	PF10326	briggsae	Serpentine type 7TM GPCR chemoreceptor Str
230	PF10326	brenneri	Serpentine type 7TM GPCR chemoreceptor Str
247	PF10318	remanei	Serpentine type 7TM GPCR chemoreceptor Srh
262	PF10318	elegans	Serpentine type 7TM GPCR chemoreceptor Srh
218	PF09379	human	FERM N-terminal domain
240	PF01827	elegans	FTH domain
325	PF01827	brenneri	FTH domain
328	PF01498	japonica	Transposase	GO:DNA binding ; GO:0003677 GO:transposition
277	PF00651	remanei	BTB/POZ domain	GO:protein binding ; GO:0005515
317	PF00651	human	BTB/POZ domain	GO:protein binding ; GO:0005515
217	PF00651	chimp	BTB/POZ domain	GO:protein binding ; GO:0005515
226	PF00651	brenneri	BTB/POZ domain	GO:protein binding ; GO:0005515
205	PF00651	bonobo	BTB/POZ domain	GO:protein binding ; GO:0005515
266	PF00646	elegans	F-box domain	GO:protein binding ; GO:0005515
329	PF00646	brenneri	F-box domain	GO:protein binding ; GO:0005515
243	PF00622	human	SPRY domain	GO:protein binding ; GO:0005515
266	PF00078	remanei	Reverse transcriptase (RNA-dependent DNA polymerase)
343	PF00071	human	Ras family	GO:GTP binding ; GO:0005525 GO:small GTPase mediated signal transduction ; GO:0007264
215	PF00071	chimp	Ras family	GO:GTP binding ; GO:0005525 GO:small GTPase mediated signal transduction ; GO:0007264
204	PF00071	bonobo	Ras family	GO:GTP binding ; GO:0005525 GO:small GTPase mediated signal transduction ; GO:0007264
263	PF00059	human	Lectin C-type domain
257	PF00046	orang	Homeobox domain	GO:DNA binding ; GO:0003677
238	PF00046	gorilla	Homeobox domain	GO:DNA binding ; GO:0003677
289	PF00046	chimp	Homeobox domain	GO:DNA binding ; GO:0003677
281	PF00046	bonobo	Homeobox domain	GO:DNA binding ; GO:0003677
252	PF00041	orang	Fibronectin type III domain	GO:protein binding ; GO:0005515
346	PF00041	bonobo	Fibronectin type III domain	GO:protein binding ; GO:0005515
212	PF00041	Dmelano	Fibronectin type III domain	GO:protein binding ; GO:0005515
316	PF00010	human	Helix-loop-helix DNA-binding domain	GO:protein dimerization activity ; GO:0046983
251	PF00002	human	7 transmembrane receptor (Secretin family)	GO:G-protein coupled receptor activity ; GO:0004930 GO:G-protein coupled receptor signaling pathway ; GO:0007186 GO:integral component of membrane ; GO:0016021
349	PF00001	orang	7 transmembrane receptor (rhodopsin family)	GO:G-protein coupled receptor activity ; GO:0004930 GO:G-protein coupled receptor signaling pathway ; GO:0007186 GO:integral component of membrane ; GO:0016021
343	PF00001	gorilla	7 transmembrane receptor (rhodopsin family)	GO:G-protein coupled receptor activity ; GO:0004930 GO:G-protein coupled receptor signaling pathway ; GO:0007186 GO:integral component of membrane ; GO:0016021
208	PF00001	elegans	7 transmembrane receptor (rhodopsin family)	GO:G-protein coupled receptor activity ; GO:0004930 GO:G-protein coupled receptor signaling pathway ; GO:0007186 GO:integral component of membrane ; GO:0016021
352	PF00001	chimp	7 transmembrane receptor (rhodopsin family)	GO:G-protein coupled receptor activity ; GO:0004930 GO:G-protein coupled receptor signaling pathway ; GO:0007186 GO:integral component of membrane ; GO:0016021
357	PF00001	bonobo	7 transmembrane receptor (rhodopsin family)	GO:G-protein coupled receptor activity ; GO:0004930 GO:G-protein coupled receptor signaling pathway ; GO:0007186 GO:integral component of membrane ; GO:0016021

## Sheet: Domains counted 400 times or higher
Counts	PfamID	Organism	Pfam functions	GO-terms
611	PF13927	human	Immunoglobulin domain
1069	PF07735	remanei	F-box associated
448	PF07735	brenneri	F-box associated
427	PF01827	remanei	FTH domain
936	PF00646	remanei	F-box domain	GO:protein binding ; GO:0005515
717	PF00078	japonica	Reverse transcriptase (RNA-dependent DNA polymerase)
447	PF00046	human	Homeobox domain	GO:DNA binding ; GO:0003677
817	PF00041	human	Fibronectin type III domain	GO:protein binding ; GO:0005515
513	PF00041	chimp	Fibronectin type III domain	GO:protein binding ; GO:0005515
509	PF00001	human	7 transmembrane receptor (rhodopsin family)	GO:G-protein coupled receptor activity ; GO:0004930 GO:G-protein coupled receptor signaling pathway ; GO:0007186 GO:integral component of membrane ; GO:0016021
